1 **Uncovering divergence in gene expression regulation in the adaptation of**  
2 **yeast to nitrogen scarcity**

3 Carlos A. Villarroel<sup>a,b,c</sup>, Macarena Bastías<sup>d</sup>, Paulo Canessa<sup>a,d</sup>, Francisco A. Cubillos<sup>a,b</sup>

4 <sup>a</sup> ANID - Programa Iniciativa Científica Milenio - Instituto Milenio de Biología Integrativa  
5 (iBio), Santiago, Chile.

6 <sup>b</sup> Universidad de Santiago de Chile, Facultad de Química y Biología, Departamento de  
7 Biología, Santiago, Chile.

8 <sup>c</sup> Laboratorio Interacciones Insecto-Planta, Instituto de Ciencias Biológicas, Universidad de  
9 Talca, 1141 Talca, Chile

10 <sup>d</sup> Centro de Biotecnología Vegetal, Facultad de Ciencias de la Vida, Universidad Andres  
11 Bello, Santiago, RM 837-0146, Chile

12 Running head: Allele-specific gene expression regulation in yeast

13 #Address correspondence to Francisco A. Cubillos [francisco.cubillos.r@usach.cl](mailto:francisco.cubillos.r@usach.cl)

14 Abstract word count = 288

15 Main text word count = 4855

16

17

18

19

20

21

22

23

24

25

## 26 **Abstract**

27 *Saccharomyces cerevisiae* rewires its transcriptional output to survive stressful  
28 environments, such as nitrogen scarcity under fermentative conditions. Although  
29 divergence in nitrogen metabolism has been described among natural yeast populations,  
30 the impact of regulatory genetic variants modulating gene expression and nitrogen  
31 consumption remains to be investigated. Here, we employed an F1 hybrid from two  
32 contrasting *S. cerevisiae* strains, providing a controlled genetic environment to map *cis*  
33 factors involved in the divergence of gene expression regulation in response to nitrogen  
34 scarcity. We used a dual approach to obtain genome-wide allele-specific profiles of  
35 chromatin accessibility, transcription factor binding, and gene expression through ATAC-  
36 seq and RNA-seq. We observed large variability in allele-specific expression and  
37 accessibility between the two genetic backgrounds, with a third of these differences  
38 specific to a deficient nitrogen environment. Furthermore, we discovered events of allelic  
39 bias in gene expression correlating with allelic bias in transcription factor binding solely  
40 under nitrogen scarcity, where the majority of these transcription factors orchestrates the  
41 Nitrogen Catabolite Repression regulatory pathway and demonstrates a *cis* x environment-  
42 specific response. Our approach allowed us to find *cis* variants modulating gene  
43 expression, chromatin accessibility and allelic differences in transcription factor binding in  
44 response to low nitrogen culture conditions.

## 45 **Importance**

46 Historically, coding variants were prioritized when searching for causal mechanisms  
47 driving adaptation of natural populations to stressful environments. However, the recent  
48 focus on non-coding variants demonstrated their ubiquitous role in adaptation. Here we  
49 performed genome-wide regulatory variation profiles between two divergent yeast strains  
50 when facing nitrogen nutritional stress. The open chromatin availability of several  
51 regulatory regions changes in response to nitrogen scarcity. Importantly we describe  
52 regulatory events that deviate between strains. Our results demonstrate a widespread  
53 variation in gene expression regulation between naturally occurring populations in  
54 response to stressful environments.

## 55 **Keywords**

56 Yeast, allele-specific, ATAC-seq, nitrogen, regulatory divergence, wine

57

## 58 **Introduction**

59           Uncovering the molecular configurations that underlie gene expression divergence  
60 in adaptation to stressful environments constitutes a relevant genetic quest. The yeast  
61 *Saccharomyces cerevisiae* provides an excellent genetic model to investigate the link  
62 between the regulatory divergence of sequences and environmental fluctuations (1). Yeast  
63 cells undergo extensive reprogramming of their gene expression profiles to withstand  
64 different environmental stresses; of these, the transcriptional response to nitrogen scarcity  
65 has been comprehensively described (2-5). Yeast fitness strongly depends on the  
66 availability of preferred nitrogen sources, and changes in such sources trigger the  
67 immediate transcriptional rewiring of nitrogen metabolism. In yeast, at least four pathways  
68 are involved in regulating nitrogen metabolism, with the Nitrogen Catabolite Repression  
69 (NCR) pathway (6) being the main orchestrator of the response to nitrogen starvation.  
70 Importantly, extensive natural variation in nitrogen consumption (7, 8) and starvation  
71 tolerance under wine fermentative conditions (3) have been found among yeast  
72 populations, demonstrating significant divergence in the regulatory mechanisms involved  
73 in the NCR pathway (9).

74 Yeast strains have different nitrogen consumption profiles, amino acid preferences, and  
75 tolerance to nitrogen scarcity during wine fermentation (7, 10). In this way, winemaking  
76 strains exhibit physiological adjustments to poor nitrogen environments while displaying  
77 good fermentation performance, a feature which is a hallmark of domestication (10-13).  
78 Using Quantitative Trait Loci (QTLs) approaches, several genes involved in differences in  
79 nitrogen consumption have been mapped (3, 7, 9, 14), including important nodes of the  
80 NCR pathway such as *GTR1* (15) and *RIM15* (16). Nevertheless, the regulation of gene  
81 expression and the modifying role of polymorphic transcription factors (TFs) in response to  
82 nitrogen scarcity in wine strains remains to be elucidated.

83 Transcriptional divergence originates from genetic variants, which can be identified  
84 through mapping of expression QTLs (1, 17). eQTLs might regulate the adjacent allele (*cis*  
85 eQTL), or affect one or multiple distant genes (*trans* eQTL). First-generation (F1) hybrids  
86 constructed from individuals of divergent lineages offer a refined approach to map *cis*  
87 factors responsible for expression divergence (18-21). In this F1 hybrid setup, the *trans*  
88 component is neglected as *trans* eQTLs affect both parental alleles in the same way,

89 therefore cancelling potentially different contributions. On the other hand, *cis* effects will  
90 remain allele-specific (22). Moreover, differences in the expression of each allele (Allele  
91 Specific Expression, ASE) are explained by the allele's local variants, which might control  
92 the physical accessibility of its promoter or regulatory region (23). This could be achieved  
93 by modulating the affinity of TF binding sites or affecting the regulation of the encoded  
94 RNA at a post-transcriptional level (24-27). Numerous studies have extensively quantified  
95 ASE in different model organisms (28-32). However, most of these studies have not  
96 incorporated a genome-wide experimental approach that assesses the *cis*-regulatory  
97 mechanisms underlying allelic expression variation. Coupling massive mRNA sequencing  
98 with assays that cut DNA *in vivo* at physically accessible chromatin regions, such as  
99 ATAC-seq (Assay for Transposase Accessible Chromatin), can portray a whole-genome  
100 profile of DNA accessibility to transcriptional regulators (33). In addition, ATAC-seq can  
101 also provide a genome-wide survey of transcription factor binding (TFB), allowing the *in*  
102 *silico* footprinting of TFB at open chromatin regions (34). ATAC-seq has been employed in  
103 yeast to investigate regulatory mechanisms driving aging (35), metabolism and cell  
104 division (36), pathogenesis (37), and cold-adaptation in an interspecies hybrid (20). Recent  
105 studies in mouse crosses have incorporated assays that profile allelic differences at the  
106 transcriptional regulatory level (38-40), demonstrating the suitability of these techniques to  
107 measure allelic imbalance in the regulation of gene expression.

108 By coupling RNA-seq and ATAC-seq , herein we measure allelic imbalance occurring at  
109 the level of gene expression, chromatin accessibility, and TF binding in an F1 hybrid  
110 between two divergent *S. cerevisiae* strains. We evaluated whether differences in nitrogen  
111 consumption between a winemaking strain (DBVPG6765), and an un-domesticated strain  
112 (YPS128) isolated from an oak tree were due to *cis*-regulatory variants modulated through  
113 environments differing in nitrogen availability. We report numerous events of allelic  
114 differences in chromatin accessibility between these two strains, remarkably few of which  
115 directly correlate with ASE. Furthermore, we show that one third of the allelic differences in  
116 gene expression and accessibility only occur under low nitrogen. By performing allele-  
117 specific TFB footprinting, we reveal TFs that potentially drive allelic expression differences,  
118 some of which have not been previously related to the regulation of nitrogen metabolism.

119

120

121

122

## 123 **Results**

### 124 **A differential response to nitrogen scarcity is observed in two divergent** 125 **yeast strains**

126 To identify *cis*-regulatory variants driving gene expression divergence in the  
127 adaptation of yeast to nitrogen scarcity, we performed Allele-Specific Expression and  
128 Accessibility (ASE and ASA, respectively) employing RNA-seq and ATAC-seq (**Fig. 1**). For  
129 this, we used the WE x NA F1 hybrid grown under low or excess nitrogen concentrations  
130 (SM60 and SM300, respectively; see methods).

131 First, we assessed nitrogen consumption kinetics in the WE x NA hybrid and the parental  
132 strains in both fermentation conditions. We sampled fermentations at an early time point,  
133 i.e. 14 hours after synthetic grape must inoculation. In SM300, the parental NA strain  
134 exhibited lower consumption levels of total YAN than the hybrid and WE strains (p-value <  
135 1e-04, ANOVA) (**Fig. 2A**). Although, we did not find higher total YAN consumption in the  
136 hybrid, after examining each nitrogen source we found that the hybrid strain consumed  
137 higher levels of serine and alanine in SM300 compared to both parental strains (p-value <  
138 0.05, ANOVA) (**Fig. 2B**). We formally estimated heterosis and found that the consumption  
139 of six amino-acids under SM300 had a heterosis coefficient higher than 1 (**Fig. 2C**).  
140 Among those aminoacids that are rapidly consumed in the hybrid, we found all amino-  
141 acids transported by Agp1p/Gnp1p (Serine, Threonine, Glutamine) (**Fig. 2C**). In contrast to  
142 SM300, under low nitrogen conditions YAN was almost depleted from the media after 14  
143 hours of fermentation, particularly by the WE and WE x NA strains, with the NA strain  
144 exhibiting lower total YAN consumption (p-value < 0.05, ANOVA, **Fig. 2A**). In addition, we  
145 found differences in the consumption kinetics for 14 amino acids when comparing the  
146 hybrid and the two parental strains (p-value < 0.05, ANOVA), together with heterosis in  
147 valine consumption (**Fig. 2BC**). After 14 days of fermentation, the three genetic  
148 backgrounds showed no differences in total CO<sub>2</sub> loss under SM300 (**Fig. 2D**), though  
149 under low nitrogen conditions the NA strain had the lowest total CO<sub>2</sub> loss (p-value WE -  
150 NA = 0.01; p-value WE x NA – NA = 0.09, ANOVA), which indicates a stronger negative  
151 effect of nitrogen scarcity on the fermentation performance of the NA strain and nitrogen

152 starvation stress (10, 41). Furthermore, low nitrogen affected all strains' fermentation  
153 kinetics compared to SM300, diminishing the maximum fermentation speed by 63%, 58%,  
154 and 60% in NA, WE, and WE x NA strains, respectively (**Fig. 2E**). These results  
155 demonstrate that the genotype affects fermentation performance during nitrogen scarcity,  
156 and suggest a dominant inheritance of efficient nitrogen consumption in yeast.

157

### 158 **Low correlation between gene expression and chromatin accessibility in response** 159 **to fermentation under low nitrogen**

160 We collected mRNA from the WE x NA hybrid after 14 hours of fermentation under  
161 SM300 and SM60. At this time point we observed primarily consumption of preferred  
162 nitrogen sources under SM300 (NCR suppressed state), and complete consumption of  
163 YAN under SM60 triggering nitrogen starvation stress (NCR active state) (**Figure 2B**) (10,  
164 41). We found a total of 3,719 DEGs (Differentially Expressed Genes) between conditions,  
165 of which 1,842 and 1,877 were upregulated or downregulated respectively in response to  
166 low nitrogen (FDR < 0.05, **Table S1a**). Among the upregulated genes, we found 69 DEGs  
167 previously classified as NCR sensitive (42). Interestingly 21 of these NCR sensitive genes  
168 were determined among the top 30 genes that were most-induced by low nitrogen (**Table**  
169 **S1b**). Enriched biological processes among low nitrogen induced genes were related to  
170 transport, energy generation, detoxification, and oxido-reduction (**Table S2a**), while genes  
171 associated with ribosomal biogenesis were significantly enriched among downregulated  
172 genes (**Table S2b**).

173 To profile the chromatin accessibility landscape in response to low nitrogen, we performed  
174 ATAC-seq in hybrid replicates collected in the aforementioned culture conditions (See **Fig.**  
175 **S1** for ATAC-seq QC plots). First, we assessed the correlation between gene expression  
176 and chromatin accessibility. We found a significant, though moderate correlation  
177 (Spearman  $R=0.28$  and  $R=0.30$  for SM300 and SM60 respectively,  $p\text{-value} < 1 \text{ e-}99$ ),  
178 between the amount of gene expression (RPKM) and the corresponding ATAC-seq signal  
179 up to 1,000 bp upstream of the transcript start site (TSS). We further examined this  
180 correlation by performing a window analysis between ATAC-seq coverage and total gene  
181 expression (RPKM) on the upstream and downstream TSS region of every *S. cerevisiae*  
182 gene (**Fig. 3A**). These results showed that the highest and most significant correlation  
183 between gene expression of a given gene and its nearest ATAC-seq signal differed

184 between nitrogen levels. In particular, for SM300 we found a narrower signal region  
185 upstream of the TSS (-350 to -50 bp, Spearman  $R = 0.32$ ,  $p$ -value  $< 1 \times 10^{-135}$ ), while we  
186 estimated a wider region for SM60 (-400 to +50 bp, Spearman  $R = 0.33$ ,  $p$ -value  $< 1 \times 10^{-140}$ ) (white squares in **Fig. 3A**). These results show that different segments within the  
187 gene's regulatory regions respond to changing nitrogen concentrations. For the analyses  
188 shown hereafter, to evaluate the corresponding ATAC-seq signal we considered a  
189 regulatory region of 400 bp upstream of the TSS of each gene.  
190

191 By analyzing 5,625 regulatory regions, we found an increase in chromatin accessibility in  
192 376 differentially accessible regions (DARs) and a decrease in 875 DARs (FDR  $< 0.05$ )  
193 under SM60, representing 22.2% of the analyzed regions (**Fig. 3B**, **Table S1**). Generally,  
194 chromatin accessibility fold changes between conditions were lower in absolute magnitude  
195 for DARs (mean  $|\text{Log}_2\text{FC}| = 0.38$ ) than those expression fold changes observed for  
196 DEGs (mean  $|\text{Log}_2\text{FC}| = 0.95$ ) ( $p$ -value = 0.001, Mann-Whitney-Wilcoxon test, **Fig. 3C**).  
197 We found that regions regulating genes involved in glucose transport and urea metabolism  
198 were less accessible under low nitrogen conditions (**Table S2c**), while regions regulating  
199 genes involved in the metabolism of non-preferred nitrogen sources were more accessible  
200 when subjected to nitrogen scarcity (**Table S2d**).

201 We inspected whether differential gene expression between conditions correlated with  
202 chromatin accessibility. Despite the positive correlation between total gene expression and  
203 upstream ATAC-seq signals (**Fig. 3A**), we found a small overlap between DEGs and  
204 differential open chromatin (**Fig. 3B**), which was in agreement with the absence of  
205 correlation when comparing  $\log_2$  fold-changes of chromatin accessibility and gene  
206 expression in response to low nitrogen (Pearson  $R = 0.015$ ). Still, 444 DEGs and DARs  
207 showed downregulation and lower accessibility, and conversely, an induction in transcript  
208 levels with higher chromatin accessibility. Downregulated genes within this positively  
209 correlated set were enriched in processes related with cytoplasmic translation and vitamin  
210 biosynthesis, while upregulated genes were enriched for catabolism of allantoin and  
211 glyoxylate (**Fig. 3D**). In contrast, a large number of DEGs related with ribosome biogenesis  
212 showed no differences in accessibility at their regulatory regions across nitrogen  
213 conditions, despite being concertedly less expressed in response to low nitrogen (**Fig.**  
214 **S2A**). In addition, among non-DEGs, we found differential accessibility in genes related  
215 with sugar transport (**Fig. S2B**). These results indicate that approximately 12% of gene  
216 expression differences in the yeast genome positively correlated with chromatin

217 accessibility differences between conditions. We would like to highlight that while RNA-seq  
218 and ATAC-seq experiments were performed independently, although carefully sampling  
219 after the same period of time. Still the absence of correlation between gene expression  
220 fold changes and chromatin accessibility has been previously observed in yeast (20, 43).  
221 In summary, chromatin accessibility results complement those obtained by RNA-seq by  
222 providing novel evidence of regulatory rewiring under contrasting nitrogen conditions.

223

### 224 **Allele-specific expression and chromatin accessibility under excess and low** 225 **nitrogen conditions**

226 We compared the transcriptional response to low nitrogen of each parental genome  
227 within a shared (WE x NA) *trans* environment by splitting RNA-seq alignments with SNP-  
228 informative reads (see Materials and Methods). We found that parental genomes display a  
229 highly similar transcriptional response to low nitrogen (Pearson R = 0.911, p-value < 2.2e-  
230 16), although differences in ASE could still be found. Therefore, we investigated ASE by  
231 performing a binomial test of read counts at 21,647 SNPs in 3,923 genes (1732 genes did  
232 not have SNPs or only had SNPs with fewer than 10 counts). Differential ASE was  
233 determined in 543 genes, of which 147 and 245 were solely found in SM300 and SM60,  
234 respectively, while 153 were significant under both conditions (**Fig. 4AB, Table S3**), the  
235 majority of which (152) maintained the ASE direction, i.e. bias in expression favored the  
236 same genotype in both conditions. Allelic ratios in both conditions were correlated  
237 (Pearson R = 0.69, P value < 1e-15), although they were lower than those described in  
238 other ASE assays in yeast (21, 44). Accordingly, a significant portion of ASE differences in  
239 yeast under contrasting nitrogen conditions are dependent on the *cis*-genotype x  
240 environment interaction, rather than primordially on the *cis*-genotype configuration.

241 Further dissection of the ASE of strongly upregulated genes under low nitrogen conditions  
242 (FC > 3, 251 DEGs) allowed us to identify key variants involved in NCR. For example, we  
243 found high WE allelic expression compared to the NA variant for the amino-acid  
244 permeases *GAP1* and *PUT4*, and for the ammonium permease *MEP2* (**Fig. 4B**). In  
245 contrast, the NA allele encoding for the NCR-sensitive allantoin transporter (*DAL5*)  
246 showed a strong bias in expression when compared to the WE allele. These results  
247 indicate that genetic variants in ammonium and specific amino-acid permeases are



248 overexpressed in wine strains when facing nitrogen scarcity, putatively due to *cis*-  
249 regulatory variants.

250 To assess these differences, allele-specific accessibility (ASA) was determined in each  
251 parental genome in response to low nitrogen within the shared *trans* environment (**Fig.**  
252 **1C**). Interestingly we found a moderate correlation between the chromatin accessibility  
253 response of both parental genomes (Pearson R= 0.529, p-value < 1e-15), which was lower  
254 than that found for the gene expression response, suggesting a greater impact of  
255 environmentally-dependent differences in *cis* regulation acting on chromatin accessibility  
256 than on gene expression. We tested allelic imbalance in chromatin accessibility (binomial  
257 test), and were able to quantify ASA in 15,333 SNPs belonging to 4,822 regulatory  
258 regions. A total of 252 regions exhibited differential ASA, and from this, 113 and 69  
259 regulatory regions showed ASA under either SM60 or SM300, respectively (**Table S3**).  
260 ASA was moderately correlated between nitrogen conditions (Pearson R = 0.61, P value <  
261 1e-15), similar to what was found for ASE. Importantly, all regions that showed ASA in  
262 both conditions (70 in total) maintained the imbalance direction, i.e. bias in accessibility  
263 favored the same genotype in both conditions (**Fig. 4C**). Among enriched biological  
264 processes in regions that showed ASA in SM60, we found more accessible regulatory  
265 regions associated to the expression of aldehyde metabolic process genes and the  
266 response to oxidative stress in the WE and NA genomes respectively (**Table S4cd**).

267 Taking the differential ASE and ASA datasets together, we assessed the intersection  
268 between them in each condition. Under nitrogen excess, 13 genes displaying ASE also  
269 showed ASA in the same direction, while 5 genes showed ASA in the opposite direction  
270 (**Fig. 4D**). Moreover, under low nitrogen, 28 genes showed ASE and ASA in the same  
271 direction, while 10 displayed ASA and ASE in opposite directions (**Fig. 4E**). Overall, these  
272 results indicate a convergence between ASA and ASE in 41 genes, where open chromatin  
273 alleles had greater expression levels. However, only 5% and 9% of genes in ASE  
274 coincided with allelic imbalance in accessibility occurring in the same direction in SM300  
275 and SM60, respectively, while the large majority of genes exhibiting ASE did not show  
276 ASA levels and viceversa. These results suggest that additional regulatory mechanisms,  
277 such as differences in transcription factor binding (TFB), could influence differences in  
278 allelic expression.

279

280 **Allelic imbalance in transcription factor binding reveal environment-dependent**  
281 **regulatory mechanisms driving gene expression divergence**

282 To explore the link between TFB and allele specific expression differences  
283 occurring in the WE x NA hybrid, we used ATAC-seq (Tn5) cut sites to infer TFB and  
284 generate genome-wide binding scores for 141 TFs. First, we calculated TFB scores  
285 inferred from cut sites from all WE x NA ATAC-seq alignments, finding 28,842 motifs likely  
286 bound by a TF in SM300 and/or SM60. To assess the correlation between TFB, gene  
287 expression and chromatin accessibility, we inspected fold changes of TFB scores in the  
288 hybrid across conditions, discovering a strong correlation with ATAC-seq fold-changes  
289 (Pearson R = 0.71, p-value < 1e-130) (**Fig. 5A**). However, no overall correlation between  
290 fold changes of TFB scores and gene expression differences between conditions was  
291 found (Pearson R=0.072, p-value 1.58e-31) (**Fig. 5A**), suggesting a complex interplay  
292 between global TFB and gene expression, while also evidencing a direct effect of  
293 chromatin accessibility on TFB scores. We re-examined the correlation between TFB  
294 scores and gene expression, but this time individually for each TF. In this way we found a  
295 significant correlation for 11 out of 141 TFs (Pearson R > 0.2, FDR < 0.1) (**Table S5a**).  
296 The Cst6p TF showed the highest correlation between TFB and gene expression (Pearson  
297 R = 0.36, FDR = 0.03) (**Fig. 5B**). Cst6p encodes for a basic leucine zipper TF involved in  
298 the stress response (45), and our results suggest a role for Cst6p in response to low  
299 nitrogen conditions. Moreover, for all TFs tested, the binding scores were highly correlated  
300 with their ATAC-seq fold changes, ranging from Dal80p (Pearson R = 0.882, FDR = 3.08  
301 e-25) to Fkh2p (Pearson R = 0.50, FDR= 3.14 e-6) (**Table S5a**) .

302 By utilizing ATAC-seq data from a hybrid strain, we were able to obtain allele specific TFB  
303 scores by splitting SNP-informative reads in the hybrid alignments (**Fig. 1E**). This allowed  
304 us to infer allele-specific binding (ASB) by estimating the TFB scores for each parental  
305 strain. We calculated ASB at 27,370 predicted binding motifs, which were on average at a  
306 distance of 23.2 bp to the nearest SNP, with 4,119 motifs (16%) overlapping with a SNP.  
307 We found a significant correlation between ASB and ASA (for SM60 Pearson R = 0.53, p-  
308 value < 1e-130). However, no genome-wide correlation was found between ASB and ASE  
309 in any condition (for SM60 Pearson R = 0.09, p-value = 4.36e-47). As previously done with  
310 the hybrid TFB scores, we also decided to inspect the correlation between ASB and ASE  
311 for each TF individually (**Table S5b**). Under SM60, we observed that the allele-specific  
312 binding for six TFs correlated with ASE of their target genes (Pearson R > 0.2, FDR <

313 0.05). Among them, we found three out of the four GATA-type zinc finger TFs that  
314 participate in NCR regulation; i.e. Gat1p, Dal80p, and Gzf3p (**Fig. 5C, Table S5b**).  
315 Together with Gln3p, these GATA TFs share very similar binding motifs (shown in **Fig.**  
316 **5C**), which suggest that these correlations might not be specific for any of these TFs in  
317 particular. In the case of Gln3p, a shorter and less informative GATA motif was used,  
318 which substantially increased the number of predicted binding sites compared to those of  
319 the other GATA factors, suggesting a stronger influence of false positive binding sites on  
320 the lack of correlation between Gln3p ASB and the ASE of its target genes under SM60  
321 (Pearson R = 0.09). We crossreferenced our Dal80p *in silico* binding data under SM60  
322 with a Dal80p Chip-seq dataset performed under a similar stress condition (42), and found  
323 agreement for Dal80p binding at 36 (53%) of 67 predicted bound promoters.

324 In addition to GATA factors, we found that Skn7p, Swi4p, Tos8p, Yap5p, Tod6p, and  
325 Yox1p TFs had a significant correlation between ASB and ASE under SM60 (**Table S5b**).  
326 Under the SM300 culture condition, we found a significant correlation between ASE and  
327 ASB solely for Yap5p and Swi4p (Pearson R > 0.2, FDR < 0.1), and specifically for this  
328 condition for Yap7p (**Table S5b**). These results suggest a role for TFs that have not  
329 previously been associated with nitrogen metabolism in the adaptation of winemaking  
330 strains to nitrogen scarcity in grape must. Nevertheless, we expect that the significant  
331 correlations found between ASB and ASE were confounded by the allele-specific ATAC-  
332 seq signal, which prompted us to evaluate our ASB data in more detail.

333 We tested for significant differences in ASB (see Materials and Methods) and found 2,254  
334 and 1,161 binding sites having differential ASB (out of 27,370 predicted binding motifs) in  
335 SM60 and SM300 respectively (FDR < 0.1) (**Table S5cd**). Only 22 % (623) of these  
336 binding sites were differentially bound in both conditions (**Fig. 5D**). Furthermore, 513  
337 (22%) and 293 (25%) of the binding sites displaying ASB overlapped with a SNP in SM60  
338 and SM300, respectively. This represents a higher proportion than that observed for all  
339 tested binding sites (16%), suggesting that binding sites co-occurring with SNPs were  
340 more likely to be differentially bound (Chi-square test, p-value = 7.3e-18).

341 Next, we wanted to identify TFs that are differentially bound to the WE or NA allele that  
342 might drive ASE in absence of chromatin accessibility differences. Hence, we focused our  
343 ASB analysis on those regulatory regions in which we did not find ASA but their genes  
344 showed ASE. In SM60, of the 311 genes that showed ASE (but not ASA), we found 55  
345 regulatory regions displaying ASB, representing 17% of the ASE differences (**Fig. 5E**, FDR

346 < 0.1). Also, 247 genes showed ASE but not ASA in SM300; of those, 30 showed ASB at  
347 their regulatory regions (**Fig. 5E**, FDR < 0.1). Moreover, many of the binding sites showing  
348 ASB did not alter allelic expression (**Fig. 5E**). These results demonstrate the additional  
349 contribution of ASB in absence of ASA towards differences in allelic expression under low  
350 nitrogen conditions.

351

352

### 353 **Identification of *cis*-acting variants driving allelic expression differences in** 354 **response to nitrogen scarcity**

355 We inspected in detail those DEGs whose expression was upregulated or  
356 downregulated by low nitrogen in the hybrid context, which also exhibited ASB and ASE  
357 but not ASA. We observed ASB in 23 and 13 regulatory regions, respectively, in DEGs  
358 induced or repressed under low nitrogen (**Fig. 6A induced in SM60, Fig. S3 repressed in**  
359 **SM60**). As an example of a binding site co-occurring with a SNP and displaying ASB, we  
360 show the TFB site for the transcriptional repressor Mot2p localized at the regulatory region  
361 of the *HXK1* gene, which encodes a hexokinase that phosphorylates hexoses for  
362 subsequent glycolysis (**Fig. 6B**). We found a 1.2 fold higher binding for the WE allele than  
363 for the NA allele (FDR 0.08), consistent with higher expression of the *HXK1*-NA allelic  
364 variant under low nitrogen. The causal variant could be a SNP (A > G) affecting the  
365 binding motif of Mot2p in the NA genome. Another example is shown for a differentially  
366 bound region in the *STF1* promoter, at which the binding sites of Gln3p and Pho2p co-  
367 localize with a SNP that might drive allelic differences in expression found for the *STF1*  
368 gene (**Fig. 6C**). Among downregulated DEGs, we observed differential binding at the  
369 motifs for the TFs Msn2p, Msn4p, and Rgm1p present in the *THI4* promoter (**Fig. S3B**).

370 As an example of a binding site that is relatively far from a putative causal SNP, but that  
371 exhibits large allelic binding differences, we found in the *MEP2* regulatory region (which  
372 encodes for a ammonium permease) two sequentially occurring GATA-like sites for Gln3p,  
373 both of which showed higher binding scores for the WE allele than for the NA variant (1.93  
374 fold higher in WE under SM60, FDR < 0.003, **Fig. 6D**), coincident with the higher  
375 expression of the *MEP2*-WE allele under SM60. Importantly, *MEP2* was highly induced  
376 under low nitrogen, and the allelic differences in binding and expression were only  
377 significant under SM60.

378 In summary, our results demonstrate that the specific identification of allele specific TFB,  
379 together with differences in chromatin accessibility, can shed light onto novel molecular  
380 targets and mechanisms driving phenotypic differences between yeast strains.

381

382

383

## 384 **Discussion**

385 In this work, we describe genome-wide allelic imbalance events at three levels -  
386 gene expression, chromatin accessibility, and transcription factor binding - which allowed  
387 us to expose *cis* mechanisms driving the adaptation to low nitrogen fermentation in  
388 winemaking yeast. The transcriptional response of the WE x NA hybrid to low nitrogen  
389 resembled that of other studies of yeast under nitrogen stress (10, 42, 46, 47). However,  
390 the numerous differences found in allele specific expression (ASE) and accessibility (ASA)  
391 suggest widespread variation in *cis* mechanisms regulating nitrogen metabolism among  
392 natural yeast populations. We found large differences in the profiles depicted by ATAC-seq  
393 and RNA-seq in response to nitrogen scarcity, even though both strategies provided  
394 similarly-enriched functional annotations among the concertedly regulated genes. We  
395 hypothesize that differences in accessibility translate into differences in gene expression at  
396 distinct times depending on the pathway involved. For example, we found increased  
397 accessibility and expression for genes associated with metabolism of non-preferred  
398 nitrogen sources (e.g. allantoin and carnitine). In contrast, we found less accessibility in six  
399 genes encoding hexose transporters without the involvement of differential gene  
400 expression, which could still have occurred at an earlier or later time-point during  
401 fermentation. Several hexose transporters are downregulated under nitrogen starvation  
402 during wine fermentation (48), with the exception of *HXT5* (49), for which we also report  
403 increased accessibility and expression under low nitrogen. In addition, we found that  
404 several ribosome biogenesis genes were less expressed under low nitrogen, but this  
405 response was absent when we inspected accessibility at their promoters, suggesting that  
406 this group of genes is regulated by mechanisms other than chromatin organization. In fact,  
407 the gene expression output that we measured with RNA-seq (mainly processed mRNA)  
408 can be influenced by mechanisms other than chromatin accessibility, including

409 transcription rate (50), mRNA turnover (51), and by regulatory elements such as TFs and  
410 non-coding RNAs (32).

411 Nitrogen availability is essential for complete wine fermentation, and nitrogen scarcity  
412 affects yeast biomass (52), fermentation performance and time to complete fermentation  
413 (3, 53). The domestication process selected wine yeasts to withstand nitrogen scarcity  
414 stress, while still maintaining good fermentation performance (12). For instance,  
415 ammonium is an excellent nitrogen source for yeast growth, and is rapidly consumed at  
416 early stages, but only if the concentration of other preferred nitrogen sources such as  
417 glutamine is low (41). Here, we found that the ammonium permease *MEP2* was highly  
418 induced under low nitrogen while also showing significant allelic bias favoring the WE  
419 allele. Our findings indicate that differential binding of Gln3p (or other GATA-like TFs) at  
420 the *MEP2* promoter might explain differences in allelic expression in the absence of  
421 differential chromatin accessibility, in agreement with Gln3p being a crucial regulator of  
422 *MEP2* expression (54). A similar case was found for the non-preferred nitrogen source  
423 proline, in which the transporter encoded by the *PUT4* gene was found in allelic bias  
424 favoring the WE allele, again in the absence of differences in chromatin accessibility. This  
425 finding is interesting since proline cannot be assimilated under oxygen-deprived conditions  
426 (55). Indeed, oxygenation has a significant effect upon wine fermentation, accelerating the  
427 fermentation rate and impacting the production of volatile compounds (56). Additionally,  
428 we found that the allantoate permease *DAL5* has a strong allelic bias favoring the NA  
429 strain. Allantoate is absent in wine must (57), and our results point to *cis* regulation  
430 orchestrating low priority uptake of allantoate in the WE background. Summarizing, the  
431 expression of genes involved in nitrogen transport was frequently found in allelic bias, in  
432 particular when cells suffered nitrogen scarcity. The expression of these transporters is  
433 mainly controlled by two pathways, the NCR and the SPS (Ssy1-Ptr3-Ssy5) sensor  
434 system, which are differentially activated depending on nitrogen availability. In wine  
435 fermentation, the SPS pathway maximizes the uptake of preferred nitrogen sources by  
436 inducing the expression of their specific permeases (41). On the other hand, the NCR  
437 pathway represses generic permeases and those involved in internalizing poor nitrogen  
438 sources, but under nitrogen insufficiency such repression is released by NCR deactivation  
439 (41). To highlight the involvement of these two pathways in the allelic differences in  
440 expression and regulation found among genes encoding for nitrogen-compound  
441 permeases, we show a summary of our findings in (**Fig. 7**).

442 Our findings indicate an important participation of GATA TFs in *cis*-regulatory divergence  
443 driving physiological differences under low nitrogen fermentation. Regions containing  
444 GATA motifs were more likely to have higher allele accessibility and/or allelic binding, an  
445 observation that correlates into higher allelic expression. Importantly, this link between  
446 imbalance in allelic expression and regulation was only significant under nitrogen stress,  
447 highlighting the role of environmental fluctuations on *cis*-acting causal variants driving  
448 eQTLs. In addition, we identified several binding motifs affected by variants that might  
449 constitute causal polymorphisms driving differential allelic expression. Certainly, allele-  
450 specific binding data obtained from digital TF footprinting serves to identify chromatin  
451 regions likely containing causal variants driving differences in allelic expression. These  
452 candidate regions that contain *cis*-regulatory variants could be subjected to experimental  
453 validation, such as precise genome editing or allele swap, to validate their role in  
454 determining phenotypic differences.

455 In conclusion, we demonstrate that joint allele-specific profiling of chromatin accessibility  
456 and gene expression of a divergent yeast cross unveil regulatory dynamics driving a  
457 considerable portion of transcriptome divergence. Our findings determine the contribution  
458 of chromatin organization towards allelic differences in expression. Importantly we  
459 detected that allele-specific TF binding adds a layer of regulation in the absence of  
460 differences in promoter accessibility. Our results improve our understanding of *cis*  
461 regulatory elements' role on nitrogen regulation and starvation adaptation in winemaking  
462 yeast.

463

## 464 **Materials and methods**

### 465 **Yeast strains and culture conditions**

466 We used *S. cerevisiae* strains DBVPG6765 (hereinafter referred to as Wine  
467 European 'WE') and YPS128 (hereinafter referred to as North American 'NA'), as  
468 previously described in (58, 59). An F1 hybrid (WE x NA) was constructed by mating  
469 haploid strains of opposite mating types of WE (*MAT $\alpha$* , *ho $\Delta$ ::NatMX*, *ura3 $\Delta$ ::KanMX*) and  
470 NA (*MAT $\alpha$* , *ho $\Delta$ ::HphMX*, *ura3 $\Delta$ ::KanMX*), which had been generated previously (59).

471 Fermentations were performed in synthetic wine must (SM) following the recipe of (10)  
472 with modifications (**Table S6**). Two SMs containing different Yeast Assimilable Nitrogen

473 (YAN) concentrations were used for fermentations, i.e. SM300 (300 mg/mL YAN, excess  
474 nitrogen) and SM60 (60 mg/mL YAN, low nitrogen).

#### 475 **Fermentation assays**

476 Pre-cultures were started from single colonies collected from YPD plates. These  
477 were grown for 48 hours in 50 mL falcon tubes containing 10 mL of SM60 or SM300 at 28  
478 °C under constant agitation (250 rpm). From these pre-cultures,  $1 \times 10^6$  cells/mL were  
479 inoculated into 50 mL of SM60 or SM300 for fermentation. We conducted fermentations in  
480 at least three biological replicates in 250 mL bottles sealed with a drilled rubber stopper  
481 coupled to an airlock filled with 80% glycerol to allow for CO<sub>2</sub> release. A 100 mm cannula  
482 was inserted into the rubber stopper to perform periodical sampling. All components were  
483 autoclaved and fermentors were assembled under sterility inside a flow cabin.  
484 Fermentations were performed under constant agitation using magnetic stirring at 25 °C.  
485 Must samples were collected by obtaining 0.5 to 1 mL of fermented SM. Fermentation  
486 kinetics were monitored by manually weighing the fermentors to determine CO<sub>2</sub> release  
487 every two days.

#### 488 **High performance liquid chromatography (HPLC)**

489 Samples obtained from fermentations were processed for quantification of amino  
490 acids using HPLC (Shimadzu, USA) with a Bio-Rad HPX –87H column (60). Briefly, 100  
491 µL of filtered must were incubated with 3 µL of DEEM (Sigma-Aldrich 87-13-8) for 30 min  
492 in a sonication bath at room temperature in a solution containing 580 µL of borate buffer  
493 (pH 9) and 250 µL of methanol. After sonication, samples were incubated for 2 hours at 70  
494 °C. After the derivatization reaction, 20 µL of the processed samples were injected into a  
495 Shimadzu Prominence HPLC (Shimadzu, USA). The concentration of each amino acid  
496 was calculated using a calibration curve obtained from sequential dilutions of non-  
497 fermented SM.

#### 498 **RNA extraction and sequencing**

499 Yeast cells of the WE x NA hybrid were collected for RNA sequencing after 14  
500 hours of fermentation in SM300 or SM60 in triplicates. Yeast cells were washed three  
501 times with PBS buffer and total RNA was extracted following a hot-formamide protocol  
502 (61). RNA in formamide was treated with DNase I (Promega, USA) to remove genomic  
503 DNA traces and purified using the GeneJET RNA Cleanup and Concentration Micro Kit  
504 (Thermo Fisher Scientific K0841). RNA integrity was confirmed using a Fragment Analyzer



505 (Agilent, USA). The RNA-seq libraries were constructed using the TruSeq RNA Sample  
506 Prep Kit v2 (Illumina, USA). The sequencing was conducted using paired-end 100-bp  
507 reads on an Illumina HiSeq in a single lane for all samples.

#### 508 **ATAC-seq assay and sequencing**

509 For ATAC-seq, fermentations of the WE and NA parental strains, together with the  
510 WE x NA hybrid, were performed in duplicates, and cells in SM60 and SM300 were  
511 sampled after 14 hours. Cells were quantified using a Neubauer counting chamber. Five  
512 million haploid WE and NA cells, and 2.5 million diploid WE x NA cells were spun down  
513 (1.8 g for 4 min at room temperature) and washed twice using SB buffer (1 M Sorbitol, 10  
514 mM MgCl<sub>2</sub>, 40 mM HEPES pH 7.5). Cells were treated with 50 mg/mL of zymolyase 20T  
515 (EUROMEDEX UZ1000-A) in 200 µL of SB for 30 min at 30 °C, after which cells were  
516 washed two times with SB buffer. Immediately after, cells were incubated for 30 min at 37  
517 °C in 50 µL of transposition mix, containing 25 µL Nextera Tagment DNA Buffer (Illumina #  
518 15027866), 22.5 µL H<sub>2</sub>O, and 2.5 µL Nextera Tagment DNA Enzyme I (Illumina #  
519 15027865). Subsequently, DNA was purified using the DNA Clean and Concentrator-5 kit  
520 (Zymo Research D4003) following the supplier's instructions.

521 Tagmented DNA was amplified and barcoded using Nextera Index i5 and i7 series PCR  
522 primers. The PCR reaction consisted of 25 µL NEBNext Hi-Fidelity 2x PCR Master Mix  
523 (New England Biolabs NEB.M0541S), 7.5 µL H<sub>2</sub>O, 6.25 µL i5 primer (10 mM), 6.25 µL i7  
524 primer (10 mM) and 5 µL tagmented DNA. PCR cycles were set as: 1 cycle: 72 °C for 5  
525 min.; 1 cycle: 98 °C for 30 s.; 8 cycles: 98 °C for 10 s., 63 °C for 30 s., 72 °C for 1 min.  
526 Subsequently, the amplified ATAC-seq library was subjected to double-sided size-  
527 selection using magnetic beads (AMPure XP, Beckman Coulter BC-A63880). Firstly, 50 µL  
528 of the library were incubated with 20 µL of beads (0.4X), after which the supernatant was  
529 collected. Subsequently, a left-side selection was performed by incubating the library with  
530 1.1X of beads, after which the supernatant was discarded. DNA bound to the beads was  
531 washed twice with freshly made 80% ethanol, and then eluted in 20 µL of H<sub>2</sub>O. Library  
532 quality was assessed using a Fragment Analyzer (Agilent, USA) and quantified in Qubit  
533 (Thermofisher, USA). Sequencing was conducted using paired-end 75-bp reads on an  
534 Illumina NextSeq 500.

#### 535 **Allele-specific read mapping**

536 To estimate allele-specific counts derived from RNA-seq and ATAC-seq reads and  
537 to account for the mapping of SNP-informative reads, we modified the *S. cerevisiae*  
538 reference genome (R64-1-1) using SNPsplit (62). Genome-wide SNPs data from the WE  
539 and NA strains were obtained from the *Saccharomyces* Genome Resequencing Project  
540 (63). This data was used to replace the reference genome nucleotide sequence at 17,425  
541 sites, in which the same genotype occurs for these two strains, but differed against the  
542 S288c reference strain. Next, the modified reference sequence was masked at 81,169  
543 polymorphic sites between the NA and WE strains. A genome index was built using  
544 Bowtie2 (64), and then used to map ATAC-seq and RNA-seq reads in the WE x NA hybrid  
545 (using Bowtie2 option 'very-sensitive'). Before allele-specific mapping, sequencing reads  
546 were processed using fastp (65) to trim low quality 3' ends (Q < 20) and to exclude reads  
547 shorter than 36 bp (-A : disable automatic adaptor trimming; -3 : trimming by quality at 3'  
548 end; -l 36 : min length of 36 bp). Alignments containing all hybrid mapped reads were used  
549 for differential analysis of gene expression and chromatin accessibility of the WE x NA  
550 hybrid response to low nitrogen. Furthermore, SNPsplit was used to divide the hybrid  
551 alignments in two bam files, each containing only SNP-informative reads corresponding to  
552 either parental background (approximately 16-22% of the total mapped reads for each  
553 parent, **Table S7**). These allele-specific alignment files were used to evaluate the  
554 response (gene expression, chromatin accessibility, and TF binding) of each parental  
555 genome to low nitrogen.

### 556 **Hybrid RNA-seq analysis**

557 RNA-seq read counts per gene in the WE x NA hybrid were obtained from bam  
558 alignments using featureCounts (66) and the modified R64-1-1 genome annotation  
559 (ENSEMBL, release date 2018-10). Genes with at least 30 read-counts across the three  
560 replicates in at least one condition were selected for further statistical analysis (5,625 out  
561 of 6,534 genes). The differential transcriptome response of the WE x NA hybrid to low  
562 nitrogen (SM60) was estimated using DESeq2 (67) (design= ~ condition).

### 563 **ATAC-seq data analysis**

564 ATAC-seq read alignments were processed as follows: i) PCR duplicates were  
565 identified and removed using Genrich ([github.com/jsh58/Genrich](https://github.com/jsh58/Genrich)), then ii) Reads mapped  
566 to blacklisted regions were removed (i.e. mitochondrial genome, ribosomal genes in  
567 chromosome 12, and subtelomeres); and iii) Only properly paired mapped reads (mates

568 mapped to the same chromosome, pairs mapped in convergent direction) were kept using  
569 sambamba (68). ATAC-seq coverages around the Transcription Start Site (TSS) of those  
570 genes that passed RNA-seq count filters were obtained using deepTools computeMatrix  
571 (10 kb bins) and plotHeatmap (69), which were then further processed for plotting with the  
572 ComplexHeatmap R package (70). TSSs were obtained from (71). Correlations between  
573 ATAC-seq coverage (RPKM) and gene expression (RPKM) were calculated using the cor  
574 R package (method = "spearman"). To match genes with their nearby ATAC-seq signal,  
575 we selected a regulatory region 400 bp upstream of the TSS for each gene. For 224 genes  
576 that lacked an annotated TSS we used the transcript start as TSS. The ATAC-seq signals  
577 of 5,625 regulatory regions were quantified by counting mapped reads using  
578 featureCounts. Differential responses in ATAC-seq in the WE x NA hybrid to low nitrogen  
579 (SM60) were estimated using DESeq2 (design= ~ condition).

580

581

## 582 **Allelic imbalance analyses of RNA-seq and ATAC-seq data**

583 To test for differential allelic imbalance in chromatin accessibility or gene  
584 expression, we used the R package MBASED on allele counts (72). Counts at each SNP  
585 were obtained using ASEReadCounter employing the pipeline described in {Mendelevich,  
586 2020 #87}. We excluded those SNPs from one parent that overlapped with an indel of the  
587 other parental strain, and those that fell within low mappability regions of either parent  
588 (determined after mapping parental DNA-seq reads to the reference genome). Besides,  
589 only SNPs with at least five counts in both parents in SM300 or SM60 were retained for  
590 further analysis. Allelic counts were obtained by summing up SNP-read counts at  
591 regulatory regions (ATAC-seq) or genes (RNA-seq). A binomial test implemented in  
592 MBASED was used to statistically evaluate allelic imbalance. Genes or regulatory regions  
593 with an adjusted *P*-value (BH correction) lower than 0.05 in at least two replicates were  
594 considered to display significant allelic imbalance.

## 595 **Allele-specific transcription factor binding analyses from ATAC-seq footprints**

596 Analysis of allele-specific transcription factor binding (TFB) from ATAC-seq  
597 footprints was performed using TOBIAS {Bentsen, 2020 #88}. Briefly, ATAC-seq  
598 alignments of the WE x NA hybrid were used to obtain Tn5 cut-sites which were corrected  
599 for cutting bias by TOBIAS ATACCorrect. The binding signal per site was calculated using

600 TOBIAS ScoreBigWig (--fp-min 5 --fp-max 30) for 5,401 regulatory regions. To calculate  
601 TFB, we obtained binding motifs for 141 yeast TFs from the JASPAR database (73).  
602 Based on this, TFB was quantified at motifs occurring in the regulatory regions by TOBIAS  
603 BinDetect. Binding scores were further processed in R. To evaluate differences in binding  
604 scores, we used a linear model implemented by the limma R package (74). We excluded  
605 from this analysis those TFs that showed low expression in SM300 or SM60 (RPKM < 5),  
606 and motif sites that were not considered by TOBIAS as "bound" in any condition. We  
607 considered binding differences with a FDR < 0.1 as statistically significant. For the analysis  
608 of allele specific TFB, allele-specific mapped reads were identified with SNPsplit (see  
609 above). Allele-specific alignments were further processed for TOBIAS analyses, as  
610 previously indicated for the hybrid. In allele-specific analysis, we excluded motifs located at  
611 regions having low ATAC-seq coverage after SNP-splitting. Total and allele-specific  
612 alignment statistics are provided in **Table S7**.

### 613 **Data availability**

614 RNA-seq and ATAC-seq raw reads are available in SRA under the project PRJNA705961.

### 615 **ACKNOWLEDGMENTS**

616 The authors are grateful to Valentina Abarca and Antonio Molina for their assistance in  
617 maintaining yeast collections. We thank J.M Alvarez for his assistance with chromatin  
618 accessibility analyses and C. Meneses (UNAB) for his support in ATAC library construction  
619 and sequencing. We thank Michael Handford (Universidad de Chile) for language support.

620 FAC was supported by Comisión Nacional de Investigación Científica y Tecnológica  
621 CONICYT FONDECYT [1180161] and ANID - Programa Iniciativa Científica Milenio -  
622 ICN17\_022. CAV was supported by CONICYT FONDECYT [3170404]. The funders had  
623 no role in study design, data collection and analysis, decision to publish, or preparation of  
624 the manuscript.

625

### 626 **References**

627

628 1. Cubillos FA. 2016. Exploiting budding yeast natural variation for industrial processes. *Curr*  
629 *Genet* 62:745-751.

- 630 2. Zhang W, Du G, Zhou J, Chen J. 2018. Regulation of Sensing, Transportation, and  
631 Catabolism of Nitrogen Sources in *Saccharomyces cerevisiae*. *Microbiology and Molecular*  
632 *Biology Reviews* 82:e00040-17.
- 634 3. Brice C, Sanchez I, Tesnière C, Blondin B. 2014. Assessing the mechanisms responsible for  
635 differences between nitrogen requirements of *saccharomyces cerevisiae* wine yeasts in  
636 alcoholic fermentation. *Applied and environmental microbiology* 80:1330-1339.
- 637 4. Natarajan K, Meyer MR, Jackson BM, Slade D, Roberts C, Hinnebusch AG, Marton MJ.  
638 2001. Transcriptional profiling shows that Gcn4p is a master regulator of gene expression  
639 during amino acid starvation in yeast. *Mol Cell Biol* 21:4347-68.
- 640 5. Gasch AP, Spellman PT, Kao CM, Carmel-Harel O, Eisen MB, Storz G, Botstein D, Brown PO.  
641 2000. Genomic expression programs in the response of yeast cells to environmental  
642 changes. *Mol Biol Cell* 11:4241-57.
- 643 6. Hofman-Bang J. 1999. Nitrogen catabolite repression in *Saccharomyces cerevisiae*.  
644 *Molecular Biotechnology* 12:35-71.
- 645 7. Jara M, Cubillos FA, Garcia V, Salinas F, Aguilera O, Liti G, Martinez C. 2014. Mapping  
646 genetic variants underlying differences in the central nitrogen metabolism in fermenter  
647 yeasts. *PLoS One* 9:e86533.
- 648 8. Ibstedt S, Stenberg S, Bagés S, Gjuvsland AB, Salinas F, Kourtchenko O, Samy JKA,  
649 Blomberg A, Omholt SW, Liti G, Beltran G, Warringer J. 2014. Concerted Evolution of Life  
650 Stage Performances Signals Recent Selection on Yeast Nitrogen Use. *Molecular Biology*  
651 *and Evolution* 32:153-161.
- 652 9. Kessi-Pérez EI, Molinet J, Martínez C. 2020. Disentangling the genetic bases of  
653 *Saccharomyces cerevisiae* nitrogen consumption and adaptation to low nitrogen  
654 environments in wine fermentation. *Biological Research* 53:2.
- 655 10. Brice C, Cubillos FA, Dequin S, Camarasa C, Martinez C. 2018. Adaptability of the  
656 *Saccharomyces cerevisiae* yeasts to wine fermentation conditions relies on their strong  
657 ability to consume nitrogen. *PLoS One* 13:e0192383.
- 658 11. Legras J-L, Galeote V, Bigey F, Camarasa C, Marsit S, Nidelet T, Sanchez I, Couloux A, Guy J,  
659 Franco-Duarte R, Marcet-Houben M, Gabaldon T, Schuller D, Sampaio JP, Dequin S. 2018.  
660 Adaptation of *S. cerevisiae* to Fermented Food Environments Reveals Remarkable Genome  
661 Plasticity and the Footprints of Domestication. *Molecular Biology and Evolution* 35:1712-  
662 1727.
- 663 12. Marsit S, Dequin S. 2015. Diversity and adaptive evolution of *Saccharomyces* wine yeast: a  
664 review. *FEMS Yeast Research* 15.
- 665 13. Su Y, Macías LG, Heras JM, Querol A, Guillamón JM. 2021. Phenotypic and genomic  
666 differences among *S. cerevisiae* strains in nitrogen requirements during wine  
667 fermentations. *Food Microbiology* 96:103685.
- 668 14. Cubillos FA, Brice C, Molinet J, Tisne S, Abarca V, Tapia SM, Oporto C, Garcia V, Liti G,  
669 Martinez C. 2017. Identification of Nitrogen Consumption Genetic Variants in Yeast  
670 Through QTL Mapping and Bulk Segregant RNA-Seq Analyses. *G3 (Bethesda)* 7:1693-1705.
- 671 15. Molinet J, Cubillos FA, Salinas F, Liti G, Martinez C. 2019. Genetic variants of TORC1  
672 signaling pathway affect nitrogen consumption in *Saccharomyces cerevisiae* during  
673 alcoholic fermentation. *PLoS One* 14:e0220515.
- 674 16. Kessi-Perez EI, Araos S, Garcia V, Salinas F, Abarca V, Larrondo LF, Martinez C, Cubillos FA.  
675 2016. RIM15 antagonistic pleiotropy is responsible for differences in fermentation and  
676 stress response kinetics in budding yeast. *FEMS Yeast Res* 16.

- 677 17. Albert FW, Kruglyak L. 2015. The role of regulatory variation in complex traits and disease.  
678 Nat Rev Genet 16:197-212.
- 679 18. Tirosh I, Reikhav S, Levy AA, Barkai N. 2009. A yeast hybrid provides insight into the  
680 evolution of gene expression regulation. Science 324:659-62.
- 681 19. Salinas F, de Boer CG, Abarca V, Garcia V, Cuevas M, Araos S, Larrondo LF, Martinez C,  
682 Cubillos FA. 2016. Natural variation in non-coding regions underlying phenotypic diversity  
683 in budding yeast. Sci Rep 6:21849.
- 684 20. Hovhannisyan H, Saus E, Ksiezopolska E, Hinks Roberts AJ, Louis EJ, Gabaldón T. 2020.  
685 Integrative Omics Analysis Reveals a Limited Transcriptional Shock After Yeast Interspecies  
686 Hybridization. Frontiers in Genetics 11.
- 687 21. Li XC, Fay JC. 2017. Cis-Regulatory Divergence in Gene Expression between Two Thermally  
688 Divergent Yeast Species. Genome Biology and Evolution 9:1120-1129.
- 689 22. Cubillos FA, Stegle O, Grondin C, Canut M, Tisne S, Gy I, Loudet O. 2014. Extensive cis-  
690 regulatory variation robust to environmental perturbation in Arabidopsis. Plant Cell  
691 26:4298-310.
- 692 23. Kita R, Venkataram S, Zhou Y, Fraser HB. 2017. High-resolution mapping of cis-regulatory  
693 variation in budding yeast. Proc Natl Acad Sci U S A 114:E10736-E10744.
- 694 24. Wittkopp PJ, Kalay G. 2011. Cis-regulatory elements: molecular mechanisms and  
695 evolutionary processes underlying divergence. Nat Rev Genet 13:59-69.
- 696 25. Wittkopp PJ, Haerum BK, Clark AG. 2004. Evolutionary changes in cis and trans gene  
697 regulation. Nature 430:85-8.
- 698 26. Chang J, Zhou Y, Hu X, Lam L, Henry C, Green EM, Kita R, Kobor MS, Fraser HB. 2013. The  
699 molecular mechanism of a cis-regulatory adaptation in yeast. PLoS Genet 9:e1003813.
- 700 27. Sharon E, Chen SA, Khosla NM, Smith JD, Pritchard JK, Fraser HB. 2018. Functional Genetic  
701 Variants Revealed by Massively Parallel Precise Genome Editing. Cell 175:544-557 e16.
- 702 28. Brem RB, Yvert G, Clinton R, Kruglyak L. 2002. Genetic dissection of transcriptional  
703 regulation in budding yeast. Science 296:752-5.
- 704 29. Cubillos FA, Yansouni J, Khalili H, Balzergue S, Elftieh S, Martin-Magniette ML, Serrand Y,  
705 Lepiniec L, Baud S, Dubreucq B, Renou JP, Camilleri C, Loudet O. 2012. Expression variation  
706 in connected recombinant populations of Arabidopsis thaliana highlights distinct  
707 transcriptome architectures. BMC Genomics 13:117.
- 708 30. Hasin-Brumshtein Y, Hormozdiari F, Martin L, van Nas A, Eskin E, Lusk AJ, Drake TA. 2014.  
709 Allele-specific expression and eQTL analysis in mouse adipose tissue. BMC Genomics  
710 15:471.
- 711 31. Li R, Jeong K, Davis JT, Kim S, Lee S, Michelmore RW, Kim S, Maloof JN. 2018. Integrated  
712 QTL and eQTL Mapping Provides Insights and Candidate Genes for Fatty Acid Composition,  
713 Flowering Time, and Growth Traits in a F(2) Population of a Novel Synthetic Allopolyploid  
714 Brassica napus. Front Plant Sci 9:1632.
- 715 32. Hill MS, Vande Zande P, Wittkopp PJ. 2020. Molecular and evolutionary processes  
716 generating variation in gene expression. Nature Reviews Genetics doi:10.1038/s41576-  
717 020-00304-w.
- 718 33. Klein DC, Hainer SJ. 2020. Genomic methods in profiling DNA accessibility and factor  
719 localization. Chromosome Research 28:69-85.
- 720 34. Tripodi IJ, Allen MA, Dowell RD. 2018. Detecting Differential Transcription Factor Activity  
721 from ATAC-Seq Data. Molecules (Basel, Switzerland) 23:1136.
- 722 35. Hendrickson DG, Soifer I, Wranik BJ, Kim G, Robles M, Gibney PA, Mclsaac RS. 2018. A new  
723 experimental platform facilitates assessment of the transcriptional and chromatin  
724 landscapes of aging yeast. eLife 7:e39911.

- 725 36. Gowans GJ, Schep AN, Wong KM, King DA, Greenleaf WJ, Morrison AJ. 2018. INO80  
726 Chromatin Remodeling Coordinates Metabolic Homeostasis with Cell Division. *Cell Reports*  
727 22:611-623.
- 728 37. Jenull S, Tscherner M, Mair T, Kuchler K. 2020. ATAC-Seq Identifies Chromatin Landscapes  
729 Linked to the Regulation of Oxidative Stress in the Human Fungal Pathogen *Candida*  
730 *albicans*. *Journal of Fungi* 6:182.
- 731 38. Rivera-Mulia JC, Dimond A, Vera D, Trevilla-Garcia C, Sasaki T, Zimmerman J, Dupont C,  
732 Gribnau J, Fraser P, Gilbert DM. 2018. Allele-specific control of replication timing and  
733 genome organization during development. *Genome research* 28:800-811.
- 734 39. Zhang S, Zhang H, Zhou Y, Qiao M, Zhao S, Kozlova A, Shi J, Sanders AR, Wang G, Luo K,  
735 Sengupta S, West S, Qian S, Streit M, Avramopoulos D, Cowan CA, Chen M, Pang ZP,  
736 Gejman PV, He X, Duan J. 2020. Allele-specific open chromatin in human iPSC neurons  
737 elucidates functional disease variants. *Science* 369:561-565.
- 738 40. Xu J, Carter AC, Gendrel A-V, Attia M, Loftus J, Greenleaf WJ, Tibshirani R, Heard E, Chang  
739 HY. 2017. Landscape of monoallelic DNA accessibility in mouse embryonic stem cells and  
740 neural progenitor cells. *Nature genetics* 49:377-386.
- 741 41. Crépin L, Nidelet T, Sanchez I, Dequin S, Camarasa C. 2012. Sequential Use of Nitrogen  
742 Compounds by *Saccharomyces cerevisiae* during Wine Fermentation: a Model Based on  
743 Kinetic and Regulation Characteristics of Nitrogen Permeases. *Applied and Environmental*  
744 *Microbiology* 78:8102-8111.
- 746 42. Ronsmans A, Wery M, Szachnowski U, Gautier C, Descrimes M, Dubois E, Morillon A,  
747 Georis I. 2019. Transcription-dependent spreading of the Dal80 yeast GATA factor across  
748 the body of highly expressed genes. *PLOS Genetics* 15:e1007999.
- 749 43. Tirosh I, Sigal N, Barkai N. 2010. Divergence of nucleosome positioning between two  
750 closely related yeast species: genetic basis and functional consequences. *Molecular*  
751 *Systems Biology* 6:365.
- 752 44. Naranjo S, Smith JD, Artieri CG, Zhang M, Zhou Y, Palmer ME, Fraser HB. 2016. Dissecting  
753 the Genetic Basis of a Complex cis-Regulatory Adaptation. *PLOS Genetics* 11:e1005751.
- 754 45. Liu G, Bergenholm D, Nielsen J. 2016. Genome-Wide Mapping of Binding Sites Reveals  
755 Multiple Biological Functions of the Transcription Factor Cst6p in *Saccharomyces*  
756 *cerevisiae*. *mBio* 7.
- 757 46. Wu J, Zhang N, Hayes A, Panoutsopoulou K, Oliver SG. 2004. Global analysis of nutrient  
758 control of gene expression in *Saccharomyces cerevisiae* during growth and  
759 starvation. *Proceedings of the National Academy of Sciences of the United States of*  
760 *America* 101:3148-3153.
- 761 47. Boer VM, de Winde JH, Pronk JT, Piper MDW. 2003. The Genome-wide Transcriptional  
762 Responses of *Saccharomyces cerevisiae* Grown on Glucose in Aerobic  
763 Chemostat Cultures Limited for Carbon, Nitrogen, Phosphorus, or Sulfur \*. *Journal of*  
764 *Biological Chemistry* 278:3265-3274.
- 765 48. Palma M, Madeira SC, Mendes-Ferreira A, Sá-Correia I. 2012. Impact of assimilable  
766 nitrogen availability in glucose uptake kinetics in *Saccharomyces cerevisiae* during  
767 alcoholic fermentation. *Microbial Cell Factories* 11:99.
- 768 49. Buziol S, Becker J, Baumeister A, Jung S, Mauch K, Reuss M, Boles E. 2002. Determination  
769 of in vivo kinetics of the starvation-induced Hxt5 glucose transporter of *Saccharomyces*  
770 *cerevisiae*. *FEMS Yeast Res* 2:283-91.

- 771 50. McManus CJ, May GE, Spealman P, Shteyman A. 2014. Ribosome profiling reveals post-  
772 transcriptional buffering of divergent gene expression in yeast. *Genome Research* 24:422-  
773 430.
- 774 51. Pai AA, Cain CE, Mizrahi-Man O, De Leon S, Lewellen N, Veyrieras J-B, Degner JF, Gaffney  
775 DJ, Pickrell JK, Stephens M, Pritchard JK, Gilad Y. 2012. The Contribution of RNA Decay  
776 Quantitative Trait Loci to Inter-Individual Variation in Steady-State Gene Expression Levels.  
777 *PLOS Genetics* 8:e1003000.
- 778 52. Crépin L, Sanchez I, Nidelet T, Dequin S, Camarasa C. 2014. Efficient ammonium uptake  
779 and mobilization of vacuolar arginine by *Saccharomyces cerevisiae* wine strains during  
780 wine fermentation. *Microb Cell Fact* 13:109.
- 781 53. BELL S-J, HENSCHKE PA. 2005. Implications of nitrogen nutrition for grapes, fermentation  
782 and wine. *Australian Journal of Grape and Wine Research* 11:242-295.
- 783 54. Lorenz MC, Heitman J. 1998. The MEP2 ammonium permease regulates pseudohyphal  
784 differentiation in *Saccharomyces cerevisiae*. *The EMBO journal* 17:1236-1247.
- 785 55. Brandriss MC, Magasanik B. 1979. Genetics and physiology of proline utilization in  
786 *Saccharomyces cerevisiae*: enzyme induction by proline. *J Bacteriol* 140:498-503.
- 787 56. Peltier E, Bernard M, Trujillo M, Prodhomme D, Barbe J-C, Gibon Y, Marullo P. 2018. Wine  
788 yeast phenomics: A standardized fermentation method for assessing quantitative traits of  
789 *Saccharomyces cerevisiae* strains in enological conditions. *PLOS ONE* 13:e0190094.
- 790 57. Gutiérrez A, Beltran G, Warringer J, Guillamón JM. 2013. Genetic basis of variations in  
791 nitrogen source utilization in four wine commercial yeast strains. *PLoS one* 8:e67166-  
792 e67166.
- 793 58. Liti G, Haricharan S, Cubillos FA, Tierney AL, Sharp S, Bertuch AA, Parts L, Bailes E, Louis EJ.  
794 2009. Segregating YKU80 and TLC1 alleles underlying natural variation in telomere  
795 properties in wild yeast. *PLoS Genet* 5:e1000659.
- 796 59. Cubillos FA, Louis EJ, Liti G. 2009. Generation of a large set of genetically tractable haploid  
797 and diploid *Saccharomyces* strains. *FEMS Yeast Res* 9:1217-25.
- 798 60. Gómez-Alonso S, Hermosín-Gutiérrez I, García-Romero E. 2007. Simultaneous HPLC  
799 analysis of biogenic amines, amino acids, and ammonium ion as aminoenone derivatives in  
800 wine and beer samples. *J Agric Food Chem* 55:608-13.
- 801 61. Shedlovskiy D, Shcherbik N, Pestov DG. 2017. One-step hot formamide extraction of RNA  
802 from *Saccharomyces cerevisiae*. *RNA Biol* 14:1722-1726.
- 803 62. Krueger F, Andrews S. 2016. SNPsplit: Allele-specific splitting of alignments between  
804 genomes with known SNP genotypes [version 2; peer review: 3 approved]. *F1000Research*  
805 5.
- 806 63. Bergström A, Simpson JT, Salinas F, Barré B, Parts L, Zia A, Nguyen Ba AN, Moses AM, Louis  
807 EJ, Mustonen V, Warringer J, Durbin R, Liti G. 2014. A high-definition view of functional  
808 genetic variation from natural yeast genomes. *Mol Biol Evol* 31:872-88.
- 809 64. Langmead B, Salzberg SL. 2012. Fast gapped-read alignment with Bowtie 2. *Nature*  
810 *Methods* 9:357-359.
- 811 65. Chen S, Zhou Y, Chen Y, Gu J. 2018. fastp: an ultra-fast all-in-one FASTQ preprocessor.  
812 *Bioinformatics* 34:i884-i890.
- 813 66. Liao Y, Smyth GK, Shi W. 2013. featureCounts: an efficient general purpose program for  
814 assigning sequence reads to genomic features. *Bioinformatics* 30:923-930.
- 815 67. Love MI, Huber W, Anders S. 2014. Moderated estimation of fold change and dispersion  
816 for RNA-seq data with DESeq2. *Genome Biology* 15:550.
- 817 68. Tarasov A, Vilella AJ, Cuppen E, Nijman IJ, Prins P. 2015. Sambamba: fast processing of NGS  
818 alignment formats. *Bioinformatics (Oxford, England)* 31:2032-2034.



- 819 69. Ramírez F, Ryan DP, Grüning B, Bhardwaj V, Kilpert F, Richter AS, Heyne S, Dündar F,  
820 Manke T. 2016. deepTools2: a next generation web server for deep-sequencing data  
821 analysis. *Nucleic Acids Research* 44:W160-W165.
- 822 70. Gu Z, Eils R, Schlesner M. 2016. Complex heatmaps reveal patterns and correlations in  
823 multidimensional genomic data. *Bioinformatics* 32:2847-2849.
- 824 71. Chereji RV, Bryson TD, Henikoff S. 2019. Quantitative MNase-seq accurately maps  
825 nucleosome occupancy levels. *Genome Biology* 20:198.
- 826 72. Mayba O, Gilbert HN, Liu J, Haverty PM, Jhunjunwala S, Jiang Z, Watanabe C, Zhang Z.  
827 2014. MBASED: allele-specific expression detection in cancer tissues and cell lines.  
828 *Genome Biology* 15:405.
- 829 73. Fornes O, Castro-Mondragon JA, Khan A, van der Lee R, Zhang X, Richmond PA, Modi BP,  
830 Correard S, Gheorghe M, Baranašić D, Santana-Garcia W, Tan G, Chèneby J, Ballester B,  
831 Parcy F, Sandelin A, Lenhard B, Wasserman WW, Mathelier A. 2019. JASPAR 2020: update  
832 of the open-access database of transcription factor binding profiles. *Nucleic Acids  
833 Research* 48:D87-D92.
- 834 74. Ritchie ME, Phipson B, Wu D, Hu Y, Law CW, Shi W, Smyth GK. 2015. limma powers  
835 differential expression analyses for RNA-sequencing and microarray studies. *Nucleic Acids  
836 Research* 43:e47-e47.

## 837 **Figures**

838 **FIG. 1. Allele-specific expression and chromatin accessibility profiling to reveal**  
839 **molecular mechanisms orchestrating gene expression divergence in response to**  
840 **nitrogen scarcity.** A) Representative haploid strains of the WE (Wine-European) and NA  
841 (North-American) lineages of *S. cerevisiae* were selected to construct a WE x NA hybrid  
842 which was used to perform fermentations in synthetic wine media under low and excess  
843 nitrogen conditions (SM60 and SM300, respectively). Large boxes denote a cis regulatory  
844 region (R.R.) and an ORF (arrow on top), whilst smaller boxes depict polymorphisms  
845 occurring in each genetic backgrounds. B) RNA-seq and ATAC-seq were employed to  
846 profile the hybrid's transcriptome and open chromatin landscape at regulatory regions  
847 between nitrogen conditions. Grey bars denote the common pool of hybrid reads. C) RNA-  
848 seq and ATACseq reads that mapped to parent-specific single-nucleotide polymorphisms  
849 (SNPs) were used to determine Allele-Specific Expression (ASE) and Allele-Specific  
850 Accessibility (ASE and ASA, respectively). Reads highlighted in colours indicate different  
851 pools according to their parental origin. D) ATAC-seq cut sites were used to infer in silico  
852 footprinting of transcription factor binding (TFB) in the hybrid. E) Allele-specific ATAC-seq  
853 alignments were separated by parental origin to obtain allele-specific ATAC-seq cut sites  
854 which were used to infer allele-specific binding (ASB) from TFB in silico footprinting.

855 **FIG. 2. Fermentation kinetics and nitrogen consumption in WE and NA parental**  
856 **strains and the WE x NA hybrid.** A) The boxplots show the total Yeast Assimilable

857 Nitrogen (YAN) consumed by the NA, WE, and WE x NA strains after 14 hours of  
858 fermentation in synthetic wine must containing excess or low nitrogen (SM300 and SM60,  
859 respectively). Consumption of each aminoacid is shown as dots. Asterisks denote  
860 significance difference (Tukey post-hoc), \* < 0.05, \*\* < 0.001, \*\*\* < 1e-5. B) The bars  
861 indicate consumption fraction of each aminoacid in SM300 and SM60 after 14 hours of  
862 fermentation by the WE x NA (yellow), WE (green), and NA (purple) strains. Letters  
863 indicate significant differences between groups (ANOVA, Tukey post hoc test). Error bars  
864 show the standard deviation (SD). C) The bars show the heterosis coefficient for the  
865 consumption of each aminoacid in SM300 and SM60. Values > 1 indicate best parent  
866 heterosis, values < -1 indicate worst-parent heterosis. D) Total production of CO<sub>2</sub> at the  
867 end of fermentation process of each indicated strain and culture condition. Letters indicate  
868 significant differences among groups (ANOVA, Tukey post hoc test) and error bars denote  
869 SD. E) Fermentation rates of the WE, NA, and WE x NA strains in SM300 and SM60  
870 culture conditions.

871 **FIG. 3. Hybrid transcriptome and regulatory region accessibility in response to**  
872 **fermentation in low nitrogen wine must.** A) The heatmaps show the Pearson correlation  
873 between ATAC-seq coverage and total gene expression of the WE x NA hybrid after 14  
874 hours of fermentation in SM300 and SM60. For each gene, different regulatory region  
875 segments were evaluated using a sliding window approach starting from 1,000 bp  
876 upstream of the transcription start site (TSS) to 200 bp upstream of the TSS, and ending  
877 from 100 bp upstream of the TSS to 500 bp downstream of the TSS. The white boxes  
878 indicate the regions with the highest correlation in SM300 and SM60. B) Upset plot  
879 showing the number of differentially expressed genes (DEGs) and differentially accessible  
880 regions (DARs), the set sizes, and the intersect among combinations. C) Average absolute  
881 Log<sub>2</sub> fold changes of the ATAC-seq and RNA-seq datasets. D) Number of genes occurring  
882 in GO terms (Biological Processes) enriched among common DEGs and DARs.

883 **FIG. 4. Allelic imbalance in accessibility and gene expression in the WE x NA hybrid.**  
884 A) Upset plot showing the number of genes in differential allelic imbalance under SM300  
885 and SM60 in the WE x NA hybrid, and the intersection between conditions. Blue bars  
886 indicate that allelic ratios were maintained between conditions, while red bars indicate that  
887 allelic ratios were inverse between conditions. B) The bar plots show the expression ratio  
888 of genes with significant ASE and induced by SM60 (FDR < 0.05, Log<sub>2</sub> fold-change > 3).  
889 Genes with allelic ratios higher than 0.5 had the higher expression of the WE allele, while

890 genes with allelic ratios lower than 0.5 had higher expression of the NA allele. Blue bars  
891 indicate genes that also showed differential ASA in the same direction of ASE, i.e. bias  
892 favoring the same genotype in accessibility and expression. C) Upset plot showing the  
893 numbers of regulatory regions in differential ASA in SM300 and SM60 and the intersection  
894 across conditions. D and E) The upset plot shows the number of differential ASE and ASA  
895 in SM300 (D) and SM60 (E), and the intersection of these within the same condition.

896 **FIG. 5. Allele-specific differences in transcription factor binding.** A) Correlation  
897 between ATAC-seq Log2 fold changes (Log2FC) and Transcription Factor Binding (TFB)  
898 Log2FC (blue dots), and RNA-seq Log2FC and TFB Log2FC (red dots) in response to low  
899 nitrogen in the WE x NA hybrid. B) Correlation between Cst6p binding scores and  
900 expression in response to low nitrogen of its target genes. C) Correlation between the  
901 allelic expression ratio of the target genes of Gat1p, Dal80p, and Gzf3p and the allelic  
902 binding ratio of these transcription factors (TFs) at their target genes regulatory regions.  
903 Allelic ratios higher than 0.5 indicate higher expression or binding of the WE allele.  
904 Sequence logos indicate the motif used for each TF to scan binding sites through the  
905 genome. D) The Venn diagram displays the number of binding sites showing significant  
906 ASB in SM300 or SM60, and in both conditions. E) The Venn diagrams indicate the  
907 number of regulatory regions having at least one binding site showing ASB, and the  
908 number which were associated with regions showing ASE or ASA, or both, in SM60 and  
909 SM300.

910 **FIG. 6. ASB in genes induced under low nitrogen and showing ASE.** A) Heatmap  
911 depicting the allele-specific binding scores of 61 TFs bound to 23 regulatory regions of  
912 genes induced by low nitrogen. These genes showed allelic imbalance in gene expression  
913 (dot plot) but no allelic differences in accessibility. TFB scores are shown as z-score. B-C-  
914 D) Three examples of allelic imbalance in TFB explaining ASE. The bar plot shows the  
915 bias-corrected Tn5 cut site signal obtained as reported by TOBIAS. Negative values (red  
916 bars) surrounded by positive values (blue bars) suggest the presence of a transcription  
917 factor binding footprint. The range of values for each bar plot is indicated. ATAC-seq  
918 coverage demonstrates similar accessibility in both parental backgrounds. Allele specific  
919 data (cut sites and coverage) were obtained after splitting SNP-informative reads from the  
920 hybrid ATAC-seq alignments. Green bars show the location of predicted motifs found at  
921 differentially bound regions. Logos show the consensus motifs.

922 **FIG. 7. Allelic imbalance profile of genes encoding permeases involved in nitrogen**  
923 **uptake.** Summary of the allelic bias in expression and accessibility found for genes  
924 encoding transporters involved in nitrogen uptake. Genes are colored according to the  
925 pathway by which they are mainly regulated (NCR or SPS). The preferred substrates  
926 indicated for each transporter are based on those described previously (41). Data obtained  
927 from ATAC-seq or RNA-seq are shown with blue or red backgrounds, respectively. The  
928 bars show the average fold-change induction (purple) or repression (green) in response to  
929 low nitrogen. The line plots show the allelic bias favoring either the WE ( $> 0.5$ ) or the NA ( $<$   
930  $0.5$ ) allele.

931

### 932 **Supplemental data**

933 **Figure S1. ATAC-seq Quality Control plots.** A) Fragment-size distribution of each  
934 ATAC-seq library mapped to the yeast genome. Peaks corresponding to nucleosome-free  
935 regions, mono-nucleosome and di-nucleosome are observed, indicating a successful  
936 ATAC-seq experiment. B) Aggregated ATAC-seq coverage upstream and downstream of  
937 the TSS of every *S. cerevisiae* gene.

938 **Figure S2. GO enrichment analyses of ATAC-seq and RNA-seq differentially**  
939 **regulated genes.** Number of DEGs or DARs occurring in enriched GO terms of different  
940 set of interest

941 **Figure S3. ASB in downregulated nitrogen-responsive genes showing ASE but not**  
942 **ASA.** A) Heatmap depicting the allele-specific binding scores of 51 TFs at 13 regulatory  
943 regions of genes repressed by low nitrogen. These genes showed allelic imbalance in  
944 gene expression (dot plot) but no allelic differences in accessibility. TFB scores are shown  
945 as z-score. B-C) Two examples of allelic imbalance in TFB explaining ASE. The bar plot  
946 shows the bias-corrected Tn5 cut site signal obtained as reported by TOBIAS. Negative  
947 values (red bars) surrounded by positive values (blue bars) suggest the presence of a  
948 transcription factor binding footprint. The range of values for each bar plot is indicated.  
949 ATAC-seq coverage demonstrates similar accessibility in both parental backgrounds.  
950 Allele specific data (cut sites and coverage) were obtained after splitting SNP-informative  
951 reads from the hybrid ATAC-seq alignments. Green bars show the location of predicted  
952 motifs found at differentially bound regions. Logos show the consensus motifs.

953 **Table S1.** A) Set of genes with differential expression and/or differential accessibility at  
954 their regulatory region in response to low nitrogen. B) List of the 30 genes that are most  
955 upregulated by low nitrogen

956 **Table S2.** Top 20 enriched GO terms of the DEGs repressed (A) or induced (B) in SM60.  
957 Top 20 enriched GO terms of the DARs repressed (C) or induced (D) in SM60.

958 **Table S3.** ASE and ASA ratio counts and statistical test

959 **Table S4.** GO enrichment of genes in ASE with higher WE (A) or NA (B) allelic expression.  
960 GO enrichment of genes in ASA with higher WE (A) or NA (B) allelic accessibility.

961 **Table S5.** A) Correlation between TFB, RNA-seq, and ATAC-seq for fold changes  
962 between conditions. B) Correlation between ASB, ASE, and ASA using counts or score  
963 ratios. Motifs with significant ASB in SM60 (C) and SM300 (D)

964 **Table S6.** Composition of SM300 and SM60

965 **Table S7.** Alignment statistics of a) RNA-seq and b) ATAC-seq

966

## Experimental setup

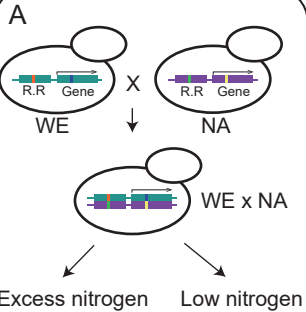

## Epigenome and transcriptome

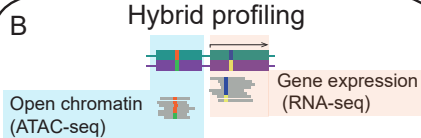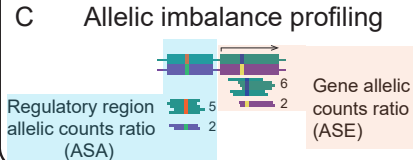

## Transcription factor footprinting

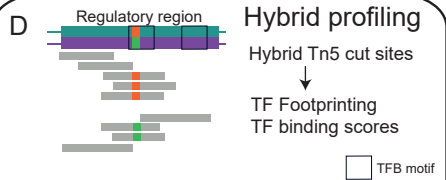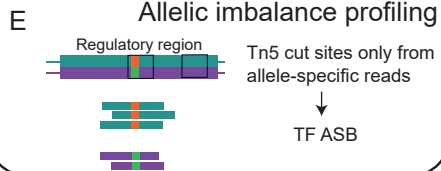

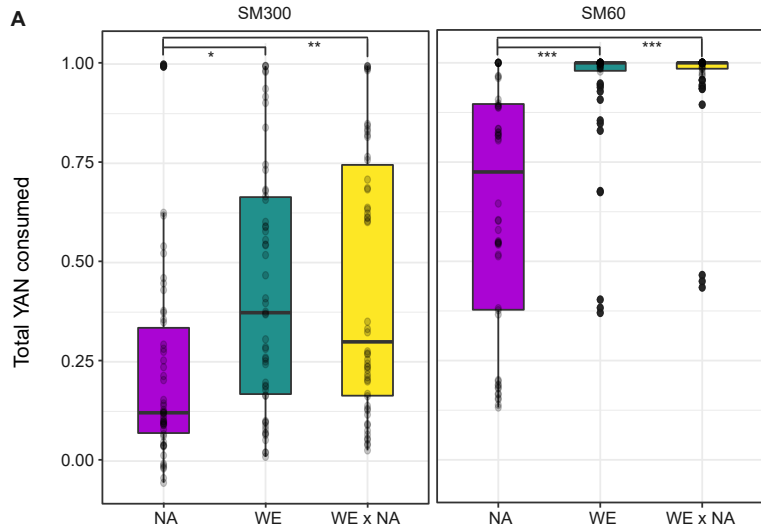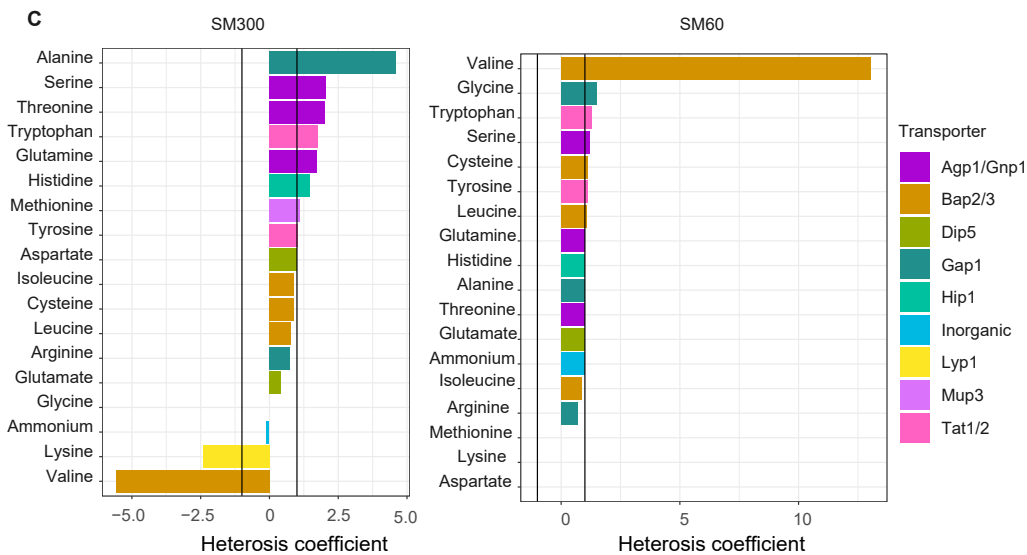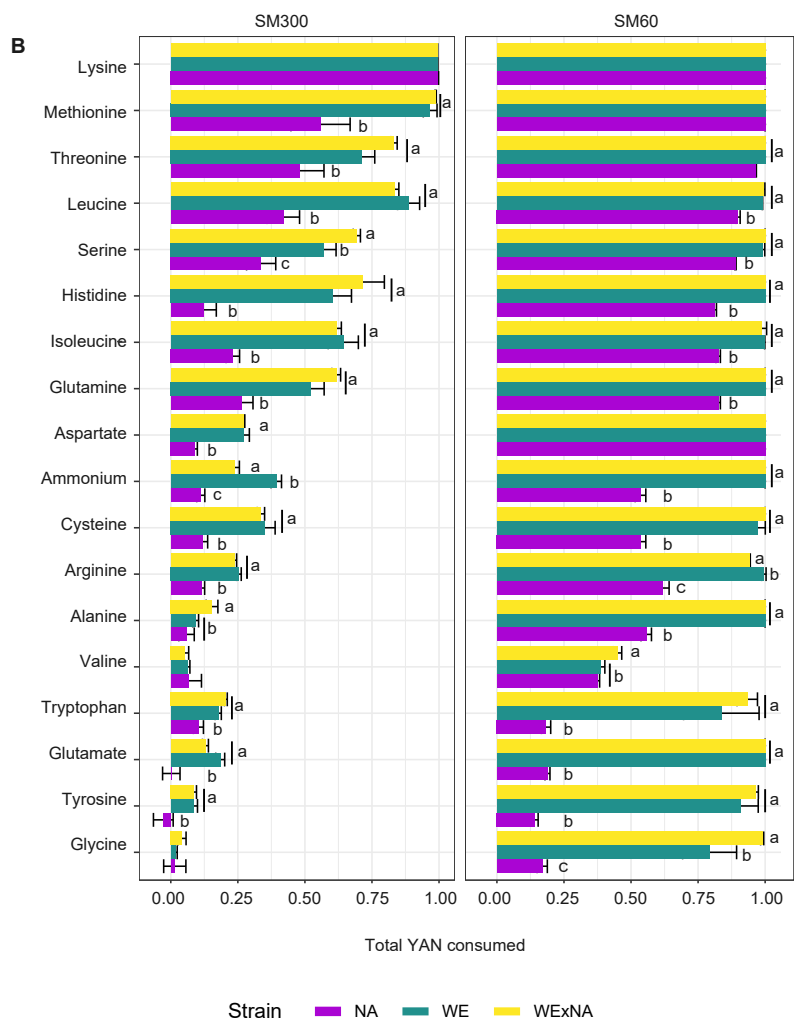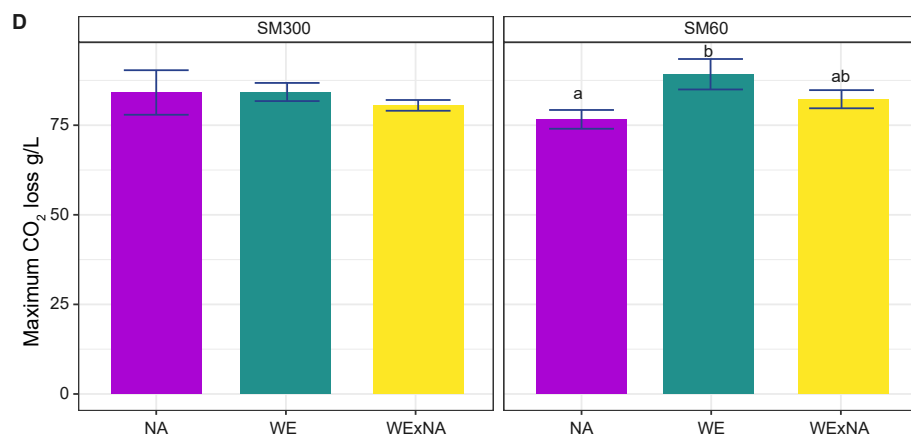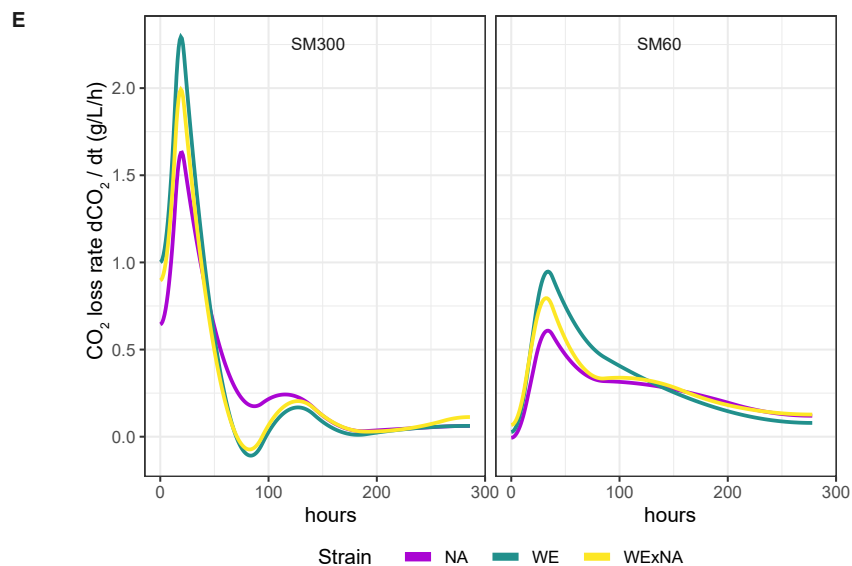

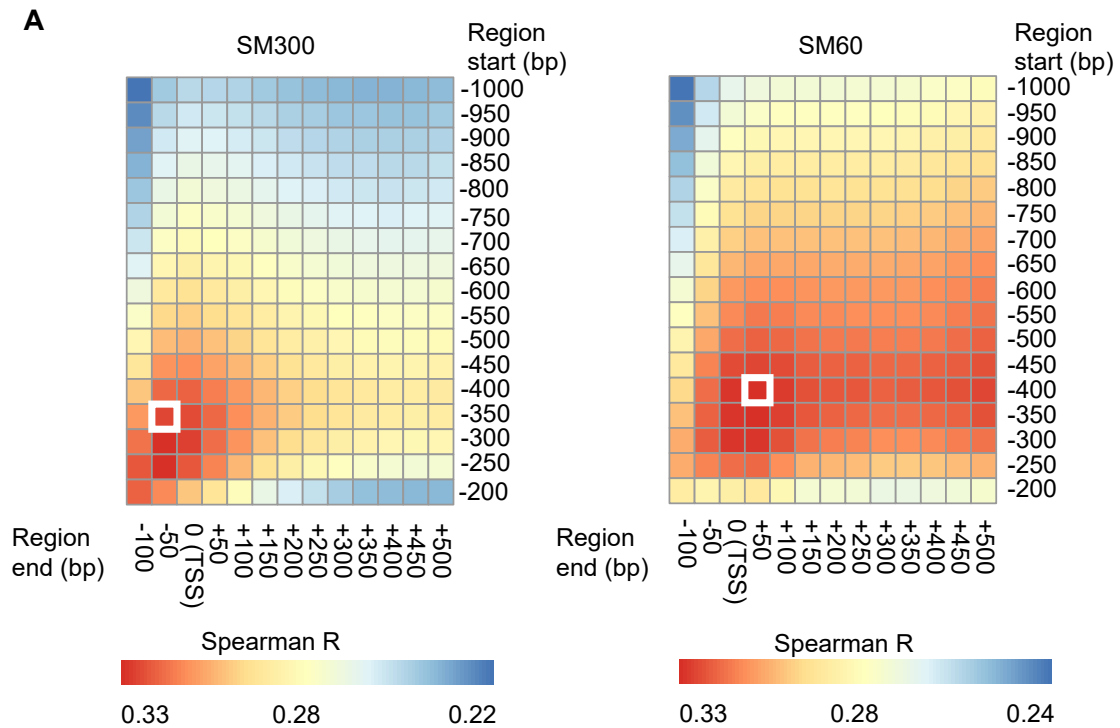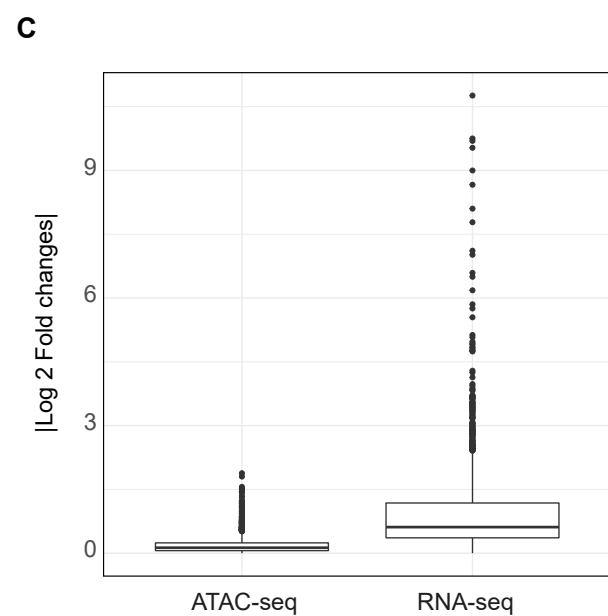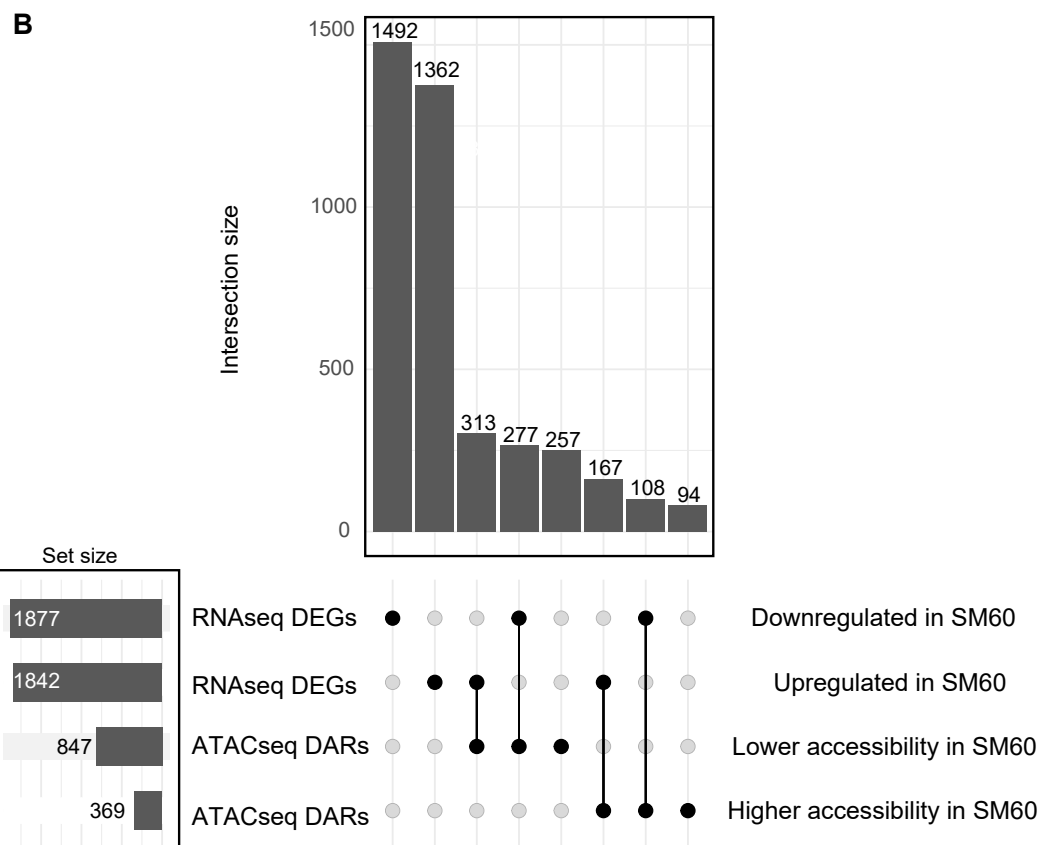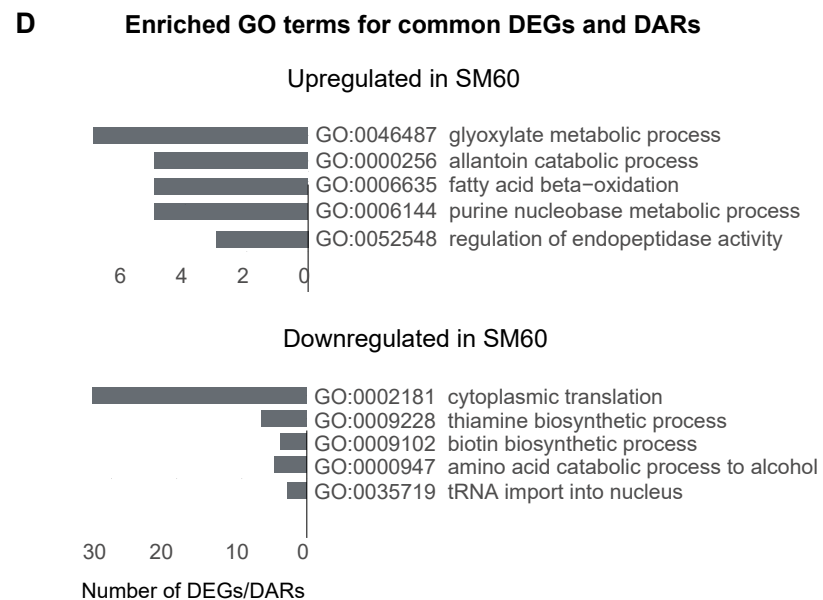



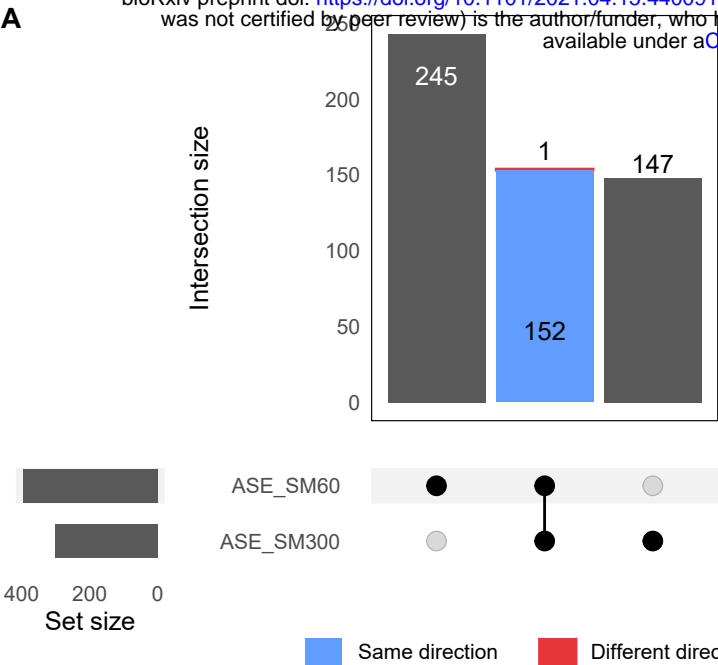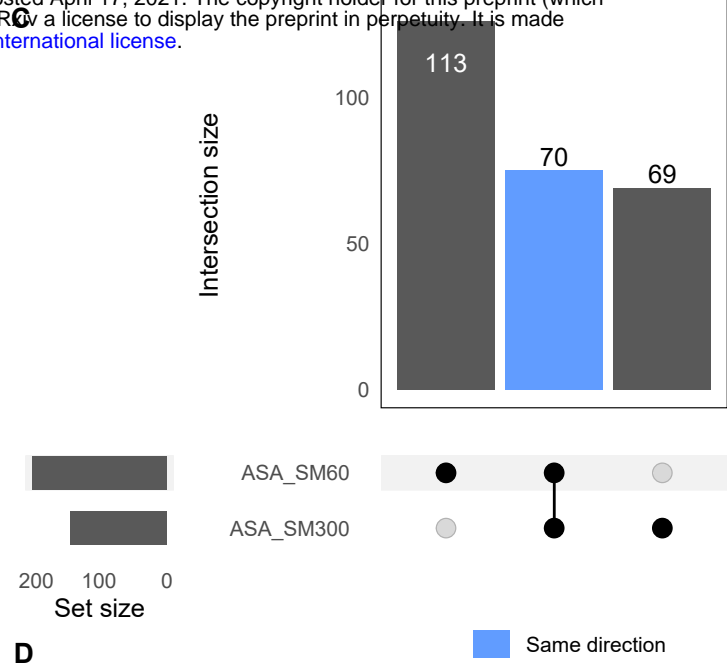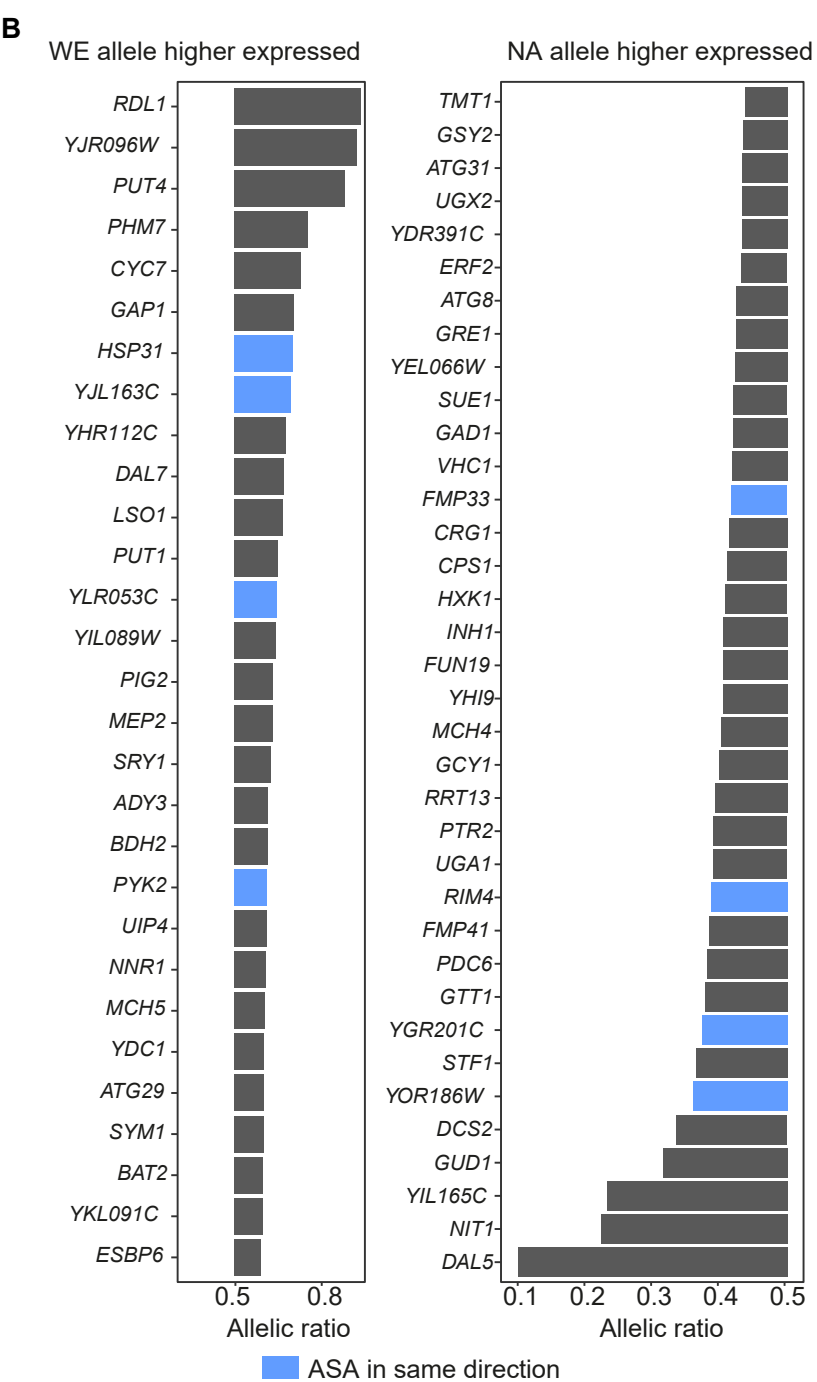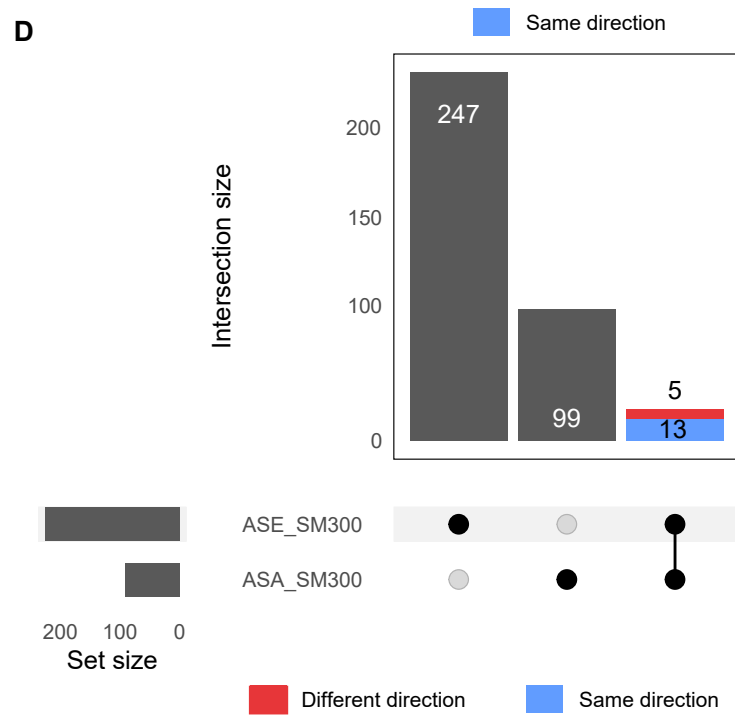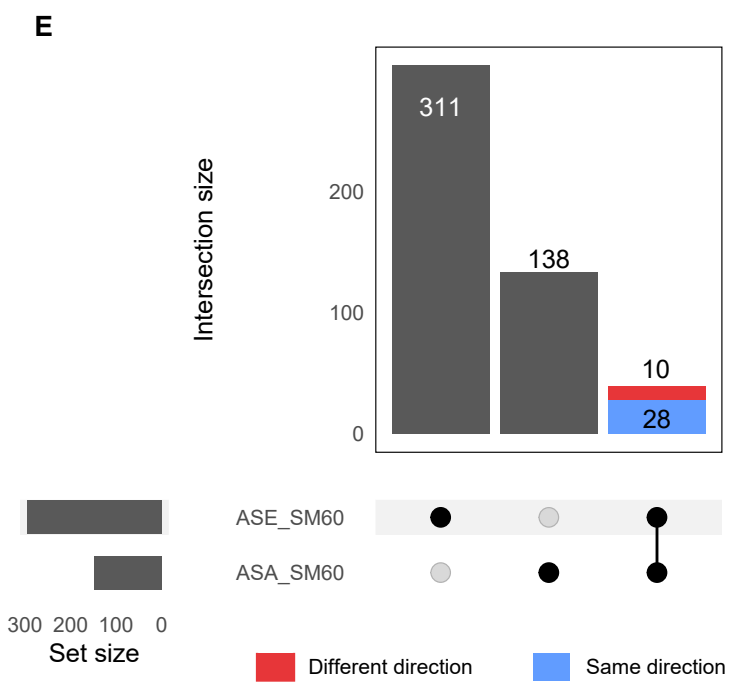

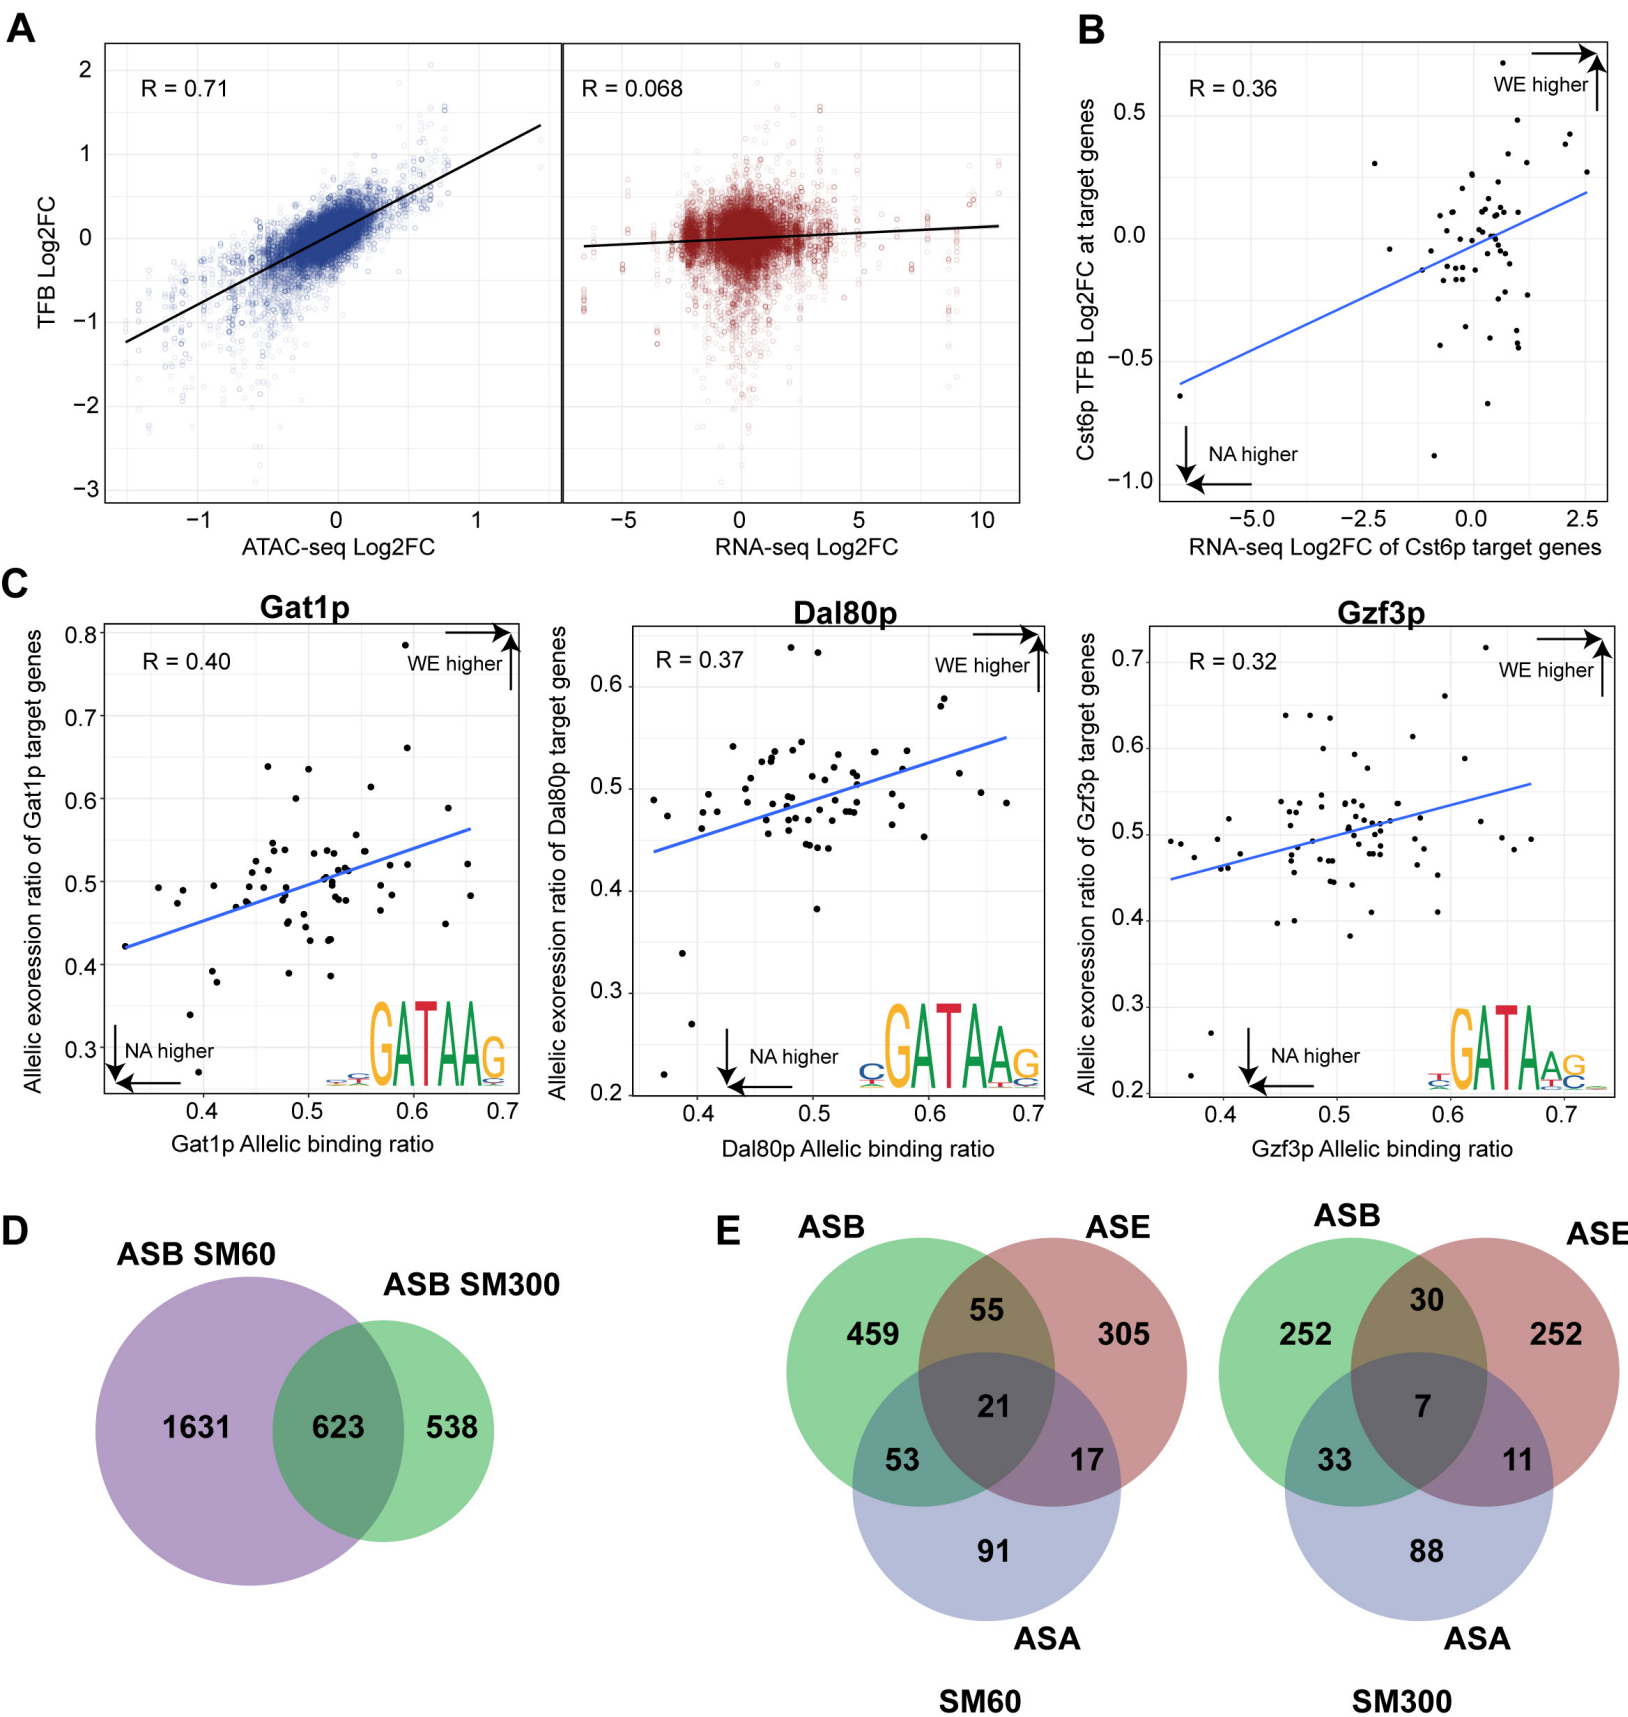

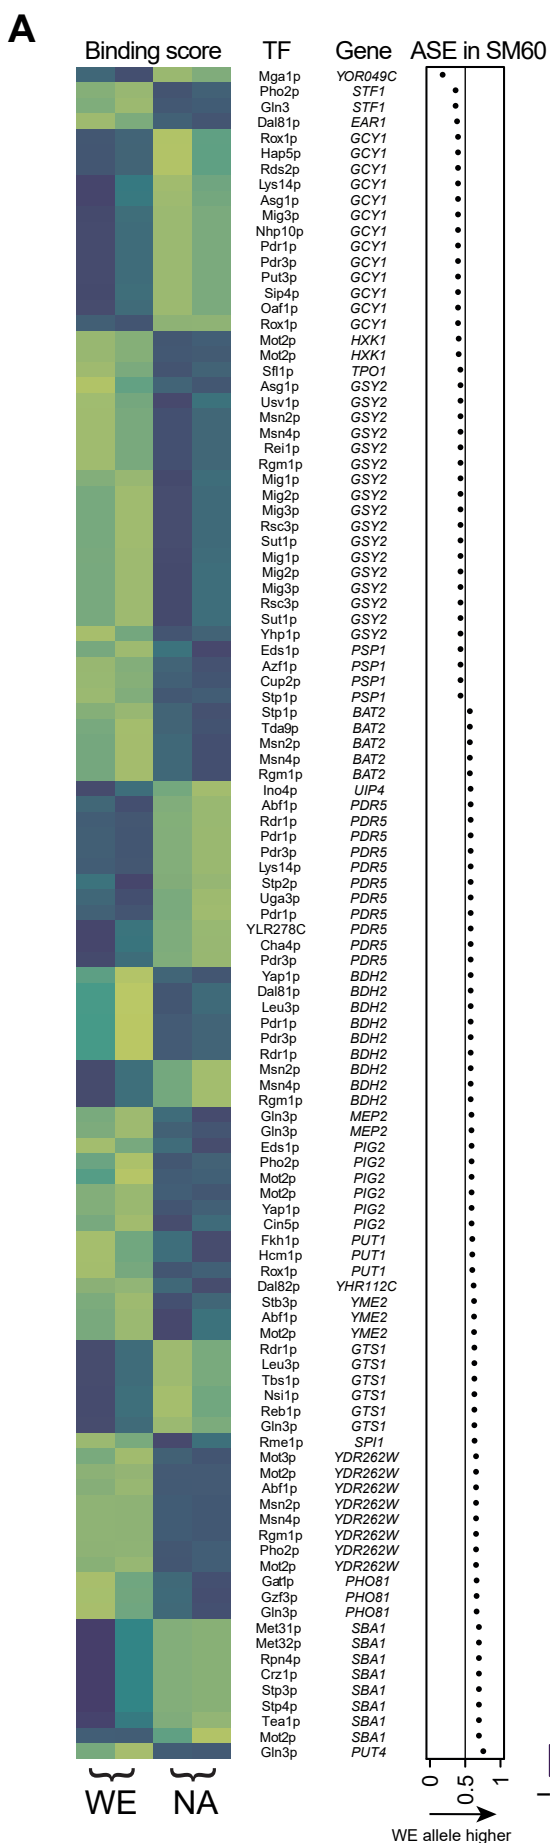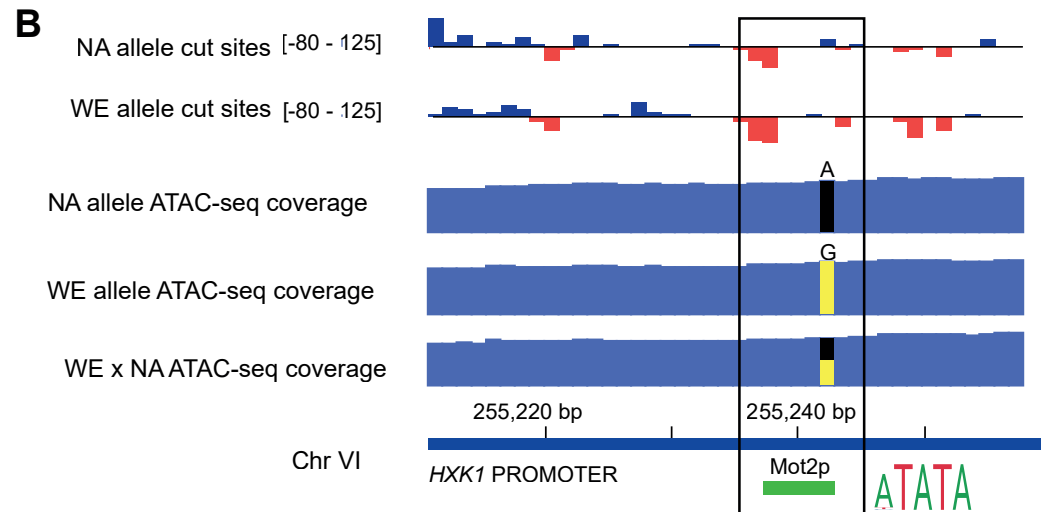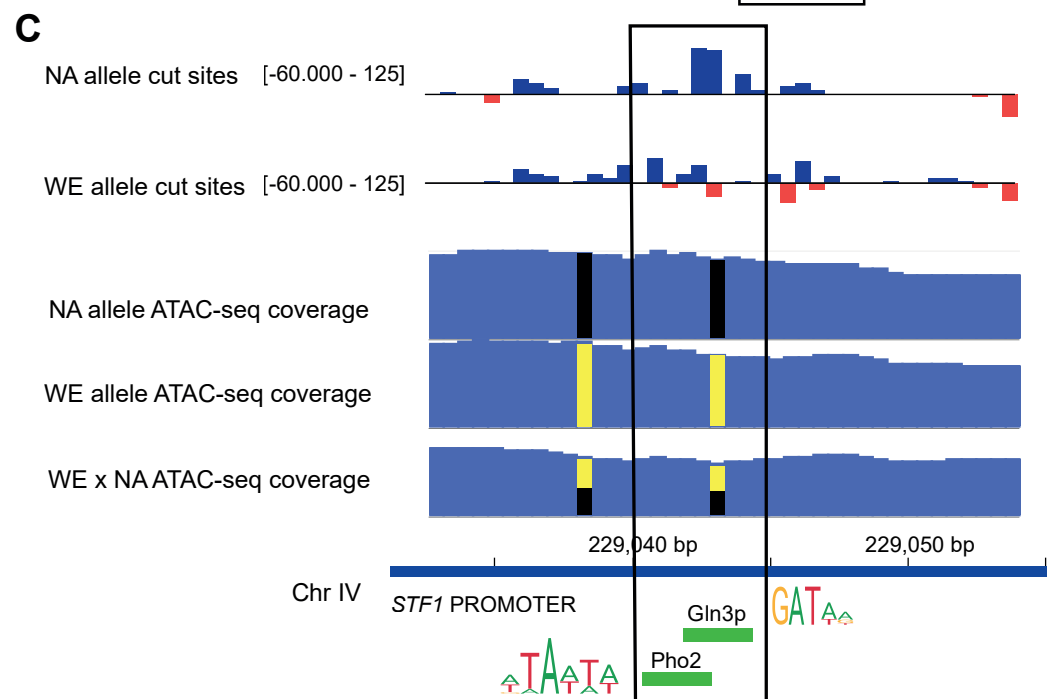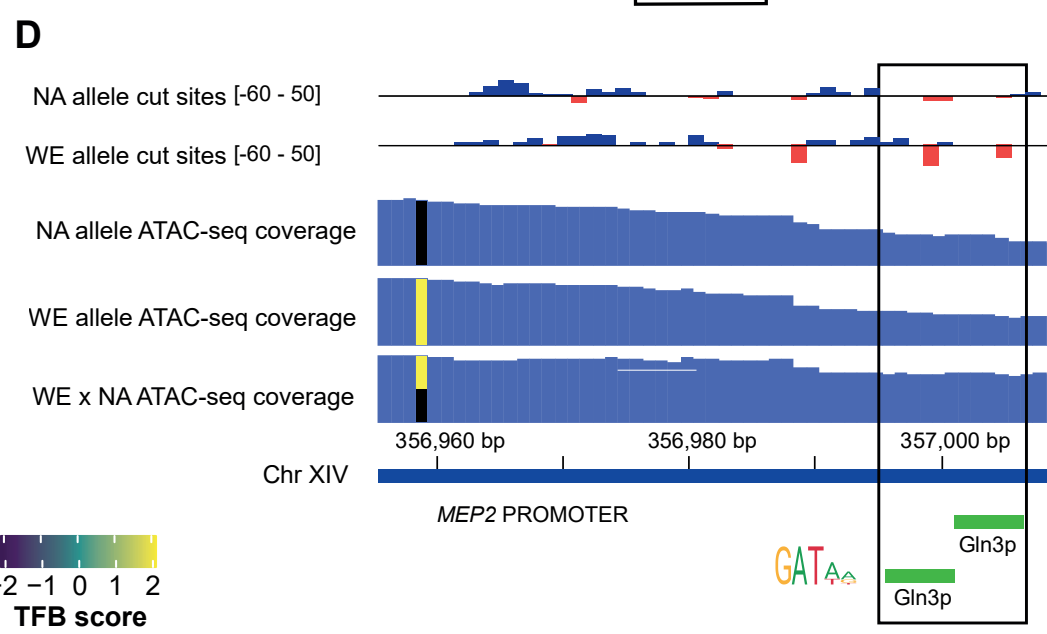

## Low nitrogen response

Accessability Gene expression

## Allelic imbalance

Excess nitrogen

Low nitrogen

Tryptophan } *TAT2*  
 Phenylalanine }  
 Tyrosine } *TAT1*  
 Glutamine *GNP1*  
 Methionine *MUP1*  
 Valine } *BAP3*  
 Isoleucine }  
 Leucine } *BAP2*  
 Glutamine *AGP1*  
 Glutamate } *DIP5*  
 Aspartate }  
 Lysine *LYP1*  
 Histidine *HIP1*  
*GAP1*  
 Arginine *CAN1*  
 Ammonium } *MEP3*  
 } *MEP2*  
 } *MEP1*  
 Proline *PUT4*

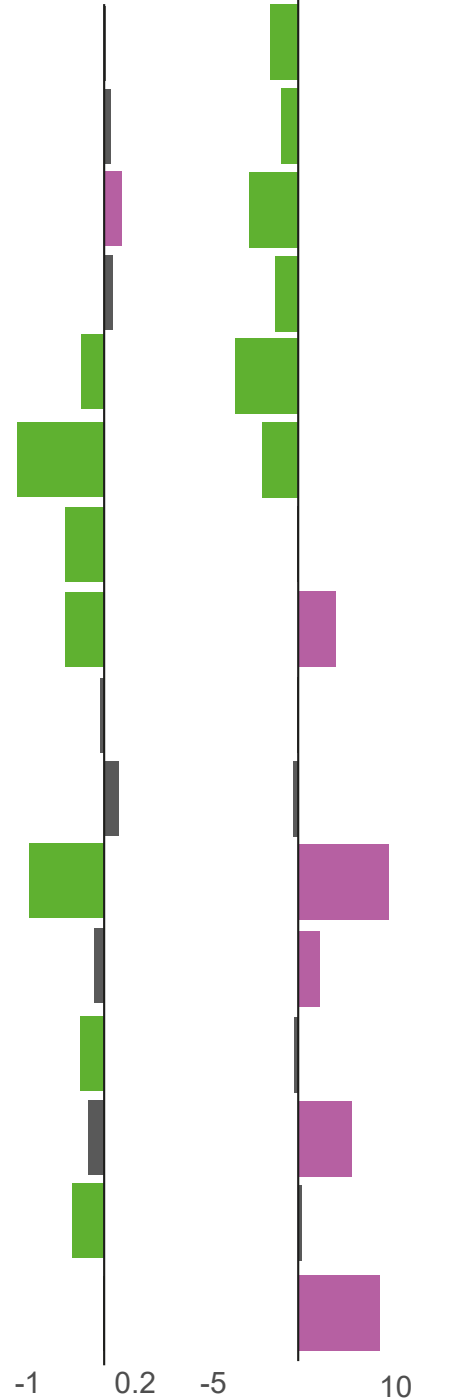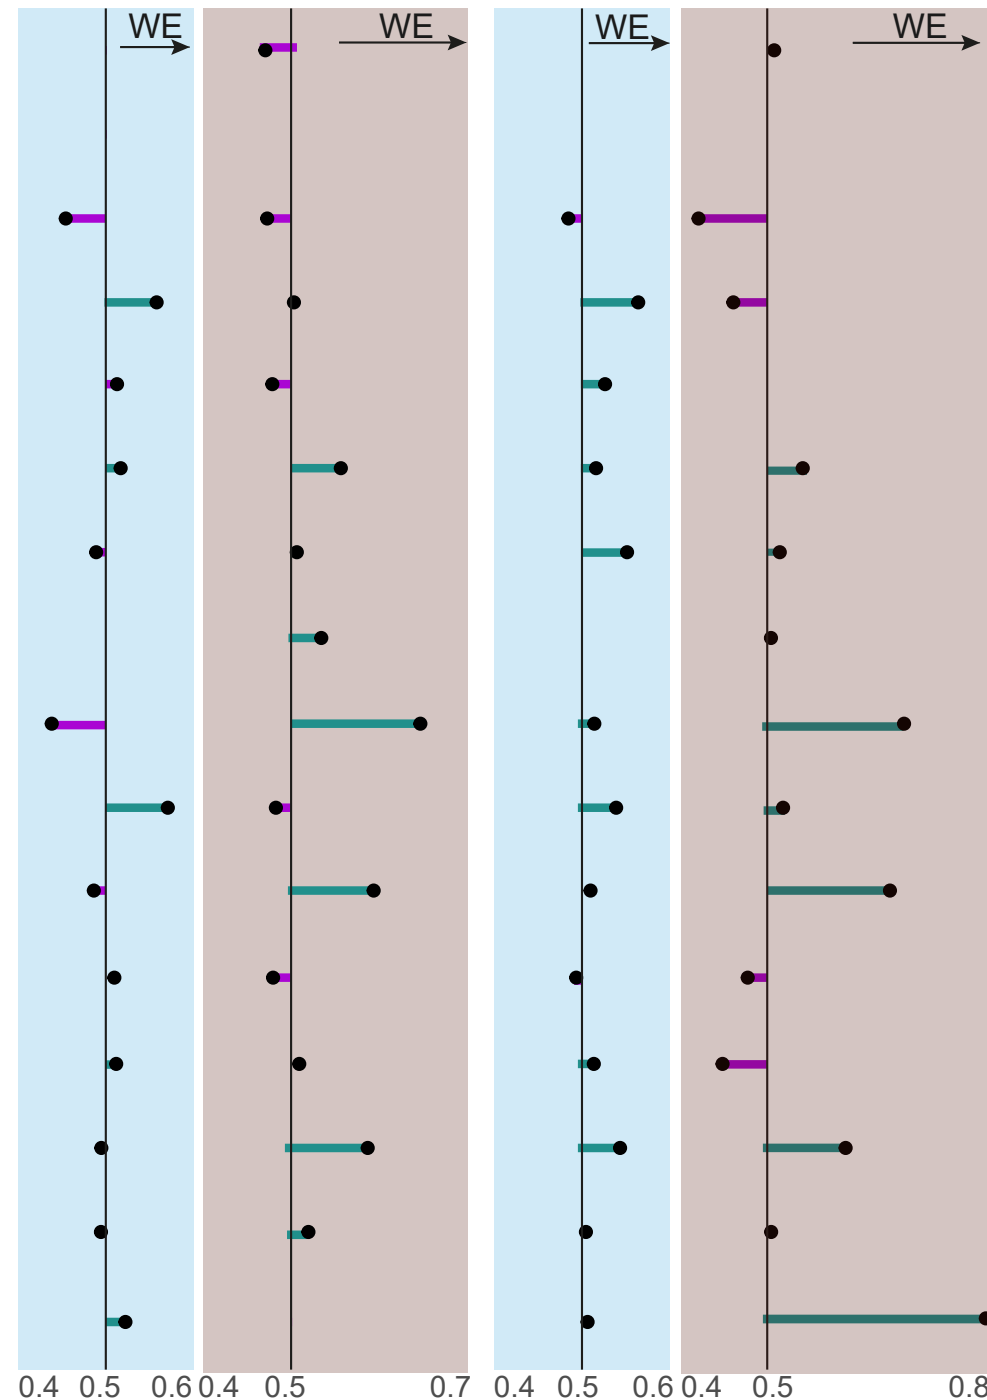

NCR regulated

SPS regulated

ASA

ASE
